# Supplementary material for: New prebiotic molecules in the interstellar medium from the reaction between vinyl alcohol and CN radicals: unsupervised reaction mechanism discovery, accurate electronic structure calculations and kinetic simulations
Source: Royal Society of Chemistry journal article supplement (doi:10.1039/d3cp02571c), 2023-01-01
Supplement: d3cp02571c1.pdf [file d3cp02571c1.pdf]

# **New Prebiotic Molecules in the Interstellar Medium from the Reaction Between Vinyl Alcohol and CN Radical<sup>†</sup>: Unsupervised Reaction Mechanism Discovery, Accurate Electronic Structure Calculations and Kinetic Simulations**

Bernardo Ballotta<sup>1</sup>, Emilio Martínez-Núñez<sup>2</sup>, Sergio Rampino<sup>3</sup>, and Vincenzo Barone<sup>1</sup>

<sup>1</sup>Scuola Normale Superiore, Piazza dei Cavalieri 7, 56126 Pisa, Italy.

<sup>2</sup>Departamento de Química Física, Facultad de Química, Campus Vida, Universidad de Santiago de Compostela, Avenida das Ciencias s/n, 15782, Santiago de Compostela, Spain.

<sup>3</sup>Università degli Studi di Padova, Dipartimento di Scienze Chimiche, Via Marzolo 1, 35131 Padova, Italy. Also at: Istituto Nazionale di Fisica Nucleare, Sezione di Pisa, Largo Bruno Pontecorvo 3, 56127 Pisa, Italy.

July 27, 2023

# Contents

|          |                                                        |           |
|----------|--------------------------------------------------------|-----------|
| <b>1</b> | <b>Supporting Information</b>                          | <b>3</b>  |
| <b>2</b> | <b>Cartesian coordinates</b>                           | <b>3</b>  |
| 2.1      | Addition reactions . . . . .                           | 3         |
| 2.1.1    | <i>syn</i> -VyA + CN . . . . .                         | 3         |
| 2.1.2    | <i>anti</i> -VyA + CN . . . . .                        | 13        |
| <b>3</b> | <b>Abstraction reactions</b>                           | <b>23</b> |
| 3.1      | C attack . . . . .                                     | 23        |
| 3.1.1    | <i>Syn</i> -VyA + CN . . . . .                         | 23        |
| 3.1.2    | <i>Anti</i> -VyA + CN . . . . .                        | 29        |
| <b>4</b> | <b>Energy tables</b>                                   | <b>35</b> |
| 4.1      | Addition reactions . . . . .                           | 35        |
| 4.2      | Abstraction reactions . . . . .                        | 36        |
| 4.2.1    | C attack . . . . .                                     | 36        |
| <b>5</b> | <b>MESS input files</b>                                | <b>37</b> |
| 5.1      | <i>Syn</i> -VyA + CN . . . . .                         | 37        |
| 5.2      | <i>Anti</i> -VyA + CN . . . . .                        | 61        |
| <b>6</b> | <b>Arrhenius plots</b>                                 | <b>86</b> |
| 6.1      | <i>syn</i> -VyA + CN . . . . .                         | 86        |
| 6.2      | <i>anti</i> -VyA + CN . . . . .                        | 86        |
| <b>7</b> | <b><math>\gamma(\beta)</math> vs NTS fitting plots</b> | <b>87</b> |

# 1 Supporting Information

Here are reported the cartesian coordinates of each optimized structures involved in the two reactions: *syn*-VyA + CN and *anti*-VyA + CN.

## 2 Cartesian coordinates

### 2.1 Addition reactions

#### 2.1.1 *syn*-VyA + CN

CN (Cyanide radical)

**Table 1** Cartesian coordinates in Å of the cyanide radical structure optimized at rev-DSDPBEP86-GD3BJ/jun-cc-pVTZ level of theory.

| Atom | X         | Y        | Z        |
|------|-----------|----------|----------|
| C    | -1.875383 | 0.453789 | 0.017829 |
| N    | -0.716421 | 0.453789 | 0.017829 |

C<sub>2</sub>H<sub>4</sub>O (*syn*-VyA)

**Table 2** Cartesian coordinates in Å of the *syn*-VyA structure optimized at rev-DSDPBEP86-GD3BJ/jun-cc-pVTZ level of theory.

| Atom | X         | Y         | Z         |
|------|-----------|-----------|-----------|
| C    | -0.036309 | 0.442827  | 0.000002  |
| O    | 1.206308  | -0.115176 | -0.000002 |
| H    | 0.027835  | 1.523455  | -0.000001 |
| C    | -1.199885 | -0.207586 | 0.000001  |
| H    | -1.253910 | -1.290335 | -0.000002 |
| H    | -2.123655 | 0.351690  | -0.000006 |
| H    | 1.116437  | -1.074853 | 0.000005  |

**s-Int1**

**Table 3** Cartesian coordinates in Å of the **s-Int1** structure optimized at rev-DSDPBEP86-GD3BJ/jun-cc-pVTZ level of theory.

| Atom | X         | Y         | Z         |
|------|-----------|-----------|-----------|
| C    | -1.223970 | 0.346877  | 0.284567  |
| O    | -1.480884 | -0.913455 | -0.162057 |
| H    | -2.121561 | 0.940412  | 0.387136  |
| C    | 0.040897  | 1.030829  | -0.153977 |
| H    | 0.211418  | 1.921086  | 0.454209  |
| H    | -0.010268 | 1.353709  | -1.203771 |
| H    | -0.655988 | -1.414046 | -0.216449 |
| C    | 1.190800  | 0.128598  | -0.026067 |
| N    | 2.045701  | -0.651991 | 0.057004  |

### s-Int1b

**Table 4** Cartesian coordinates in Å of the **s-Int1b** structure optimized at rev-DSDPBEP86-GD3BJ/jun-cc-pVTZ level of theory.

| Atom | X         | Y         | Z         |
|------|-----------|-----------|-----------|
| C    | 0.608031  | 0.077743  | 0.482179  |
| O    | 1.603376  | -0.532773 | -0.264103 |
| H    | 0.753870  | 0.115309  | 1.558569  |
| C    | -0.101622 | 1.228876  | -0.170371 |
| H    | 0.174886  | 1.443105  | -1.195982 |
| H    | -0.398541 | 2.070548  | 0.443327  |
| H    | 1.599009  | -1.476259 | -0.070555 |
| C    | -0.848535 | -0.058934 | 0.027189  |
| N    | -1.819387 | -0.773261 | -0.085589 |

### s-Int2

**Table 5** Cartesian coordinates in Å of the **s-Int2** structure optimized at rev-DSDPBEP86-GD3BJ/jun-cc-pVTZ level of theory.

| Atom | X         | Y         | Z         |
|------|-----------|-----------|-----------|
| C    | 0.424723  | -0.018446 | 0.383703  |
| O    | 1.006460  | -1.208950 | -0.140369 |
| H    | 0.560788  | -0.108137 | 1.466272  |
| C    | 1.086852  | 1.217589  | -0.126004 |
| H    | 2.154941  | 1.311218  | 0.005584  |
| H    | 0.522218  | 2.012839  | -0.587756 |
| H    | 0.992787  | -1.145271 | -1.102593 |
| C    | -1.033056 | 0.018850  | 0.124049  |
| N    | -2.170629 | 0.053585  | -0.102315 |

### s-Int3

**Table 6** Cartesian coordinates in Å of the **s-Int3** structure optimized at rev-DSDPBEP86-GD3BJ/jun-cc-pVTZ level of theory.

| Atom | X         | Y         | Z         |
|------|-----------|-----------|-----------|
| C    | 0.988855  | -0.451602 | 0.291772  |
| O    | 2.181772  | 0.091644  | -0.250676 |
| H    | 0.700065  | -1.384477 | -0.203082 |
| C    | -0.141240 | 0.528383  | 0.246121  |
| H    | 0.057252  | 1.572710  | 0.446049  |
| H    | 2.046477  | 0.238001  | -1.192277 |
| C    | -1.461617 | 0.120365  | 0.020576  |
| N    | -2.547823 | -0.241163 | -0.175942 |
| H    | 1.225660  | -0.692625 | 1.332968  |

### s-Int4

**Table 7** Cartesian coordinates in Å of the **s-Int4** structure optimized at rev-DSDPBEP86-GD3BJ/jun-cc-pVTZ level of theory.

| Atom | X         | Y         | Z         |
|------|-----------|-----------|-----------|
| C    | 0.338179  | 0.053219  | 0.000062  |
| O    | 0.862528  | 1.306811  | 0.000292  |
| C    | 1.325205  | -1.052983 | 0.000045  |
| H    | 1.968304  | -0.991214 | 0.883150  |
| H    | 0.816834  | -2.015413 | -0.000143 |
| H    | 0.152117  | 1.959414  | 0.000287  |
| C    | -1.050149 | -0.116959 | -0.000144 |
| N    | -2.208459 | -0.235861 | -0.000314 |
| H    | 1.968528  | -0.990987 | -0.882881 |

### s-Int5

**Table 8** Cartesian coordinates in Å of the **s-Int5** structure optimized at rev-DSDPBEP86-GD3BJ/jun-cc-pVTZ level of theory.

| Atom | X         | Y         | Z         |
|------|-----------|-----------|-----------|
| C    | 0.409848  | -0.041316 | 0.380390  |
| O    | 1.041703  | -1.144416 | -0.140658 |
| C    | 1.125194  | 1.214977  | -0.154543 |
| H    | 1.065265  | 1.238867  | -1.241852 |
| H    | 0.635570  | 2.101157  | 0.248889  |
| C    | -1.038927 | 0.003264  | 0.057753  |
| N    | -2.171740 | 0.059832  | -0.186926 |
| H    | 2.168228  | 1.191981  | 0.156014  |
| H    | 0.521602  | -0.063452 | 1.472807  |

### s-TS1

**Table 9** Cartesian coordinates in Å of the **s-TS1** structure optimized at rev-DSDPBEP86-GD3BJ/jun-cc-pVTZ level of theory.

| Atom | X         | Y         | Z         |
|------|-----------|-----------|-----------|
| C    | 0.667077  | 0.096591  | 0.485498  |
| O    | 1.634643  | -0.636635 | -0.148131 |
| H    | 0.807100  | 0.126835  | 1.556499  |
| C    | -0.094898 | 1.197815  | -0.185872 |
| H    | 0.167373  | 1.426518  | -1.215603 |
| H    | -0.355272 | 2.063858  | 0.415481  |
| H    | 1.427359  | -0.716241 | -1.085950 |
| C    | -0.934516 | -0.001828 | -0.000229 |
| N    | -1.827872 | -0.791445 | -0.050937 |

**s-TS1b****Table 10** Cartesian coordinates in Å of the **s-TS1b** structure optimized at rev-DSDPBEP86-GD3BJ/jun-cc-pVTZ level of theory.

| Atom | X         | Y         | Z         |
|------|-----------|-----------|-----------|
| C    | 0.579745  | 0.065395  | 0.458799  |
| O    | 1.577886  | -0.582191 | -0.265314 |
| H    | 0.740393  | 0.115893  | 1.535460  |
| C    | 0.020950  | 1.289451  | -0.169491 |
| H    | 0.192060  | 1.436633  | -1.225814 |
| H    | -0.304558 | 2.112406  | 0.449097  |
| H    | 1.542735  | -1.523286 | -0.062155 |
| C    | -0.829581 | -0.182495 | 0.091930  |
| N    | -1.904478 | -0.640018 | -0.123799 |

**s-TS3****Table 11** Cartesian coordinates in Å of the **s-TS3** structure optimized at rev-DSDPBEP86-GD3BJ/jun-cc-pVTZ level of theory.

| Atom | X         | Y         | Z         |
|------|-----------|-----------|-----------|
| C    | 1.250669  | 0.421444  | -0.080454 |
| O    | 1.448643  | -0.922534 | -0.134443 |
| H    | 2.114504  | 1.008116  | 0.195654  |
| C    | -0.102803 | 0.996542  | 0.152658  |
| H    | 0.500170  | 1.057870  | -0.988633 |
| H    | -0.181906 | 1.956790  | 0.641123  |
| H    | 0.610965  | -1.384199 | 0.013819  |
| C    | -1.210093 | 0.115617  | 0.129903  |
| N    | -2.059686 | -0.679345 | 0.077561  |

**s-TS3b****Table 12** Cartesian coordinates in Å of the **s-TS3b** structure optimized at rev-DSDPBEP86-GD3BJ/jun-cc-pVTZ level of theory.

| Atom | X         | Y         | Z         |
|------|-----------|-----------|-----------|
| C    | 0.255727  | 0.377936  | 0.511840  |
| O    | 1.217745  | -1.312316 | -0.036073 |
| H    | 0.515450  | 0.158045  | 1.537357  |
| C    | 1.023432  | 1.184436  | -0.249777 |
| H    | 0.702847  | 1.496782  | -1.234800 |
| H    | 1.999153  | 1.490612  | 0.098749  |
| H    | 1.018149  | -1.323017 | -0.985933 |
| C    | -1.099169 | 0.063911  | 0.121422  |
| N    | -2.190669 | -0.166943 | -0.188721 |

### s-TS4

**Table 13** Cartesian coordinates in Å of the s-TS4 structure optimized at rev-DSDPBEP86-GD3BJ/jun-cc-pVTZ level of theory.

| Atom | X         | Y         | Z         |
|------|-----------|-----------|-----------|
| C    | 1.218794  | 0.359823  | 0.129795  |
| O    | 1.447658  | -0.937661 | -0.082283 |
| H    | 2.129943  | 0.922701  | 0.278346  |
| C    | 0.007550  | 0.967935  | 0.082590  |
| H    | -0.255485 | 1.534396  | -1.637180 |
| H    | -0.090116 | 1.995308  | 0.398433  |
| H    | 0.608169  | -1.408334 | -0.201017 |
| C    | -1.162855 | 0.135973  | 0.051064  |
| N    | -2.045135 | -0.617700 | 0.023905  |

### s-TS5

**Table 14** Cartesian coordinates in Å of the s-TS5 structure optimized at rev-DSDPBEP86-GD3BJ/jun-cc-pVTZ level of theory.

| Atom | X         | Y         | Z         |
|------|-----------|-----------|-----------|
| C    | -0.911418 | -0.314912 | -0.087016 |
| O    | -2.187371 | 0.126116  | -0.081448 |
| H    | -0.811696 | -1.154395 | 1.549218  |
| C    | 0.104414  | 0.552000  | 0.111747  |
| H    | -0.085893 | 1.574247  | 0.408131  |
| H    | -2.789749 | -0.616243 | -0.187521 |
| C    | 1.452092  | 0.102200  | 0.004034  |
| N    | 2.550544  | -0.258025 | -0.080419 |
| H    | -0.725060 | -1.309320 | -0.478730 |

### s-TS8

**Table 15** Cartesian coordinates in Å of the s-TS8 structure optimized at rev-DSDPBEP86-GD3BJ/jun-cc-pVTZ level of theory.

| Atom | X         | Y         | Z         |
|------|-----------|-----------|-----------|
| C    | 1.267046  | 0.339467  | 0.113826  |
| O    | 1.434166  | -0.873503 | 0.112479  |
| H    | 2.120280  | 1.027310  | 0.197248  |
| C    | -0.071833 | 1.002080  | -0.112612 |
| H    | -0.063410 | 1.449299  | -1.115315 |
| H    | -0.193053 | 1.828586  | 0.593385  |
| H    | 1.477279  | -1.623256 | -1.150525 |
| C    | -1.204727 | 0.085736  | -0.004447 |
| N    | -2.115708 | -0.626082 | 0.082118  |

**s-TS10****Table 16** Cartesian coordinates in Å of the **s-TS10** structure optimized at rev-DSDPBEP86-GD3BJ/jun-cc-pVTZ level of theory.

| Atom | X         | Y         | Z         |
|------|-----------|-----------|-----------|
| C    | 0.302171  | -0.068947 | 0.490469  |
| O    | 0.997951  | -1.130198 | -0.185764 |
| H    | 0.385532  | -0.151275 | 1.574392  |
| C    | 1.221740  | 0.927431  | -0.157514 |
| H    | 0.828727  | 1.513614  | -0.979728 |
| H    | 1.998643  | 1.360990  | 0.460350  |
| H    | 1.704876  | -0.199318 | -0.678716 |
| C    | -1.111398 | 0.022089  | 0.103609  |
| N    | -2.229604 | 0.112745  | -0.193324 |

**s-TS12****Table 17** Cartesian coordinates in Å of the **s-TS12** structure optimized at rev-DSDPBEP86-GD3BJ/jun-cc-pVTZ level of theory.

| Atom | X         | Y         | Z         |
|------|-----------|-----------|-----------|
| C    | 0.334038  | -0.054029 | 0.133156  |
| O    | 0.929903  | -1.280255 | -0.049322 |
| H    | 0.732929  | 0.651726  | 1.118530  |
| C    | 1.132907  | 1.179164  | -0.041148 |
| H    | 0.638686  | 2.112256  | -0.261441 |
| H    | 2.206066  | 1.076333  | -0.087525 |
| H    | 1.472745  | -1.238061 | -0.848368 |
| C    | -1.091167 | 0.006170  | 0.023773  |
| N    | -2.249515 | 0.075763  | -0.029666 |

**s-TS13****Table 18** Cartesian coordinates in Å of the **s-TS13** structure optimized at rev-DSDPBEP86-GD3BJ/jun-cc-pVTZ level of theory.

| Atom | X         | Y         | Z         |
|------|-----------|-----------|-----------|
| C    | 0.404534  | 0.110560  | 0.080546  |
| O    | 0.933802  | 1.210862  | 0.154848  |
| C    | 1.145341  | -1.181204 | -0.032381 |
| H    | 2.198169  | -1.021530 | 0.189752  |
| H    | 0.716415  | -1.928851 | 0.637712  |
| H    | 1.425798  | 1.899735  | -1.094031 |
| C    | -1.063633 | 0.018064  | 0.003480  |
| N    | -2.214645 | -0.085852 | -0.057717 |
| H    | 1.036995  | -1.560560 | -1.054883 |



**s-TS14****Table 19** Cartesian coordinates in Å of the **s-TS14** structure optimized at rev-DSDPBEP86-GD3BJ/jun-cc-pVTZ level of theory.

| Atom | X         | Y         | Z         |
|------|-----------|-----------|-----------|
| C    | -0.427525 | 0.205295  | 0.055679  |
| O    | -0.882098 | 1.320709  | -0.116335 |
| C    | -1.236125 | -1.069884 | -0.062106 |
| H    | -1.198752 | -1.372550 | -1.112793 |
| H    | -0.815043 | -1.873649 | 0.540853  |
| C    | 1.052554  | -0.007870 | 0.004781  |
| N    | 2.195794  | -0.202452 | -0.061282 |
| H    | -2.268772 | -0.870287 | 0.216498  |
| H    | -0.364628 | 0.202725  | 1.724963  |

**s-TS15****Table 20** Cartesian coordinates in Å of the **s-TS15** structure optimized at rev-DSDPBEP86-GD3BJ/jun-cc-pVTZ level of theory.

| Atom | X         | Y         | Z         |
|------|-----------|-----------|-----------|
| C    | -0.310687 | 0.527182  | 0.408540  |
| O    | -0.868530 | 1.354743  | -0.294369 |
| C    | -1.281700 | -1.294700 | -0.095820 |
| H    | -1.035936 | -1.322914 | -1.148311 |
| H    | -0.764334 | -1.986617 | 0.557108  |
| C    | 1.047279  | 0.024054  | 0.078946  |
| N    | 2.112807  | -0.374459 | -0.155865 |
| H    | -2.289028 | -1.004616 | 0.168934  |
| H    | -0.591439 | 0.351855  | 1.457777  |

**s-TS16****Table 21** Cartesian coordinates in Å of the **s-TS16** structure optimized at rev-DSDPBEP86-GD3BJ/jun-cc-pVTZ level of theory.

| Atom | X         | Y         | Z         |
|------|-----------|-----------|-----------|
| C    | 0.436290  | 0.033779  | 0.059402  |
| O    | 0.996474  | -1.197203 | -0.142723 |
| H    | 0.329343  | -0.013623 | 1.856427  |
| C    | 1.172628  | 1.151842  | -0.077762 |
| H    | 0.693242  | 2.117949  | -0.053825 |
| H    | 2.248480  | 1.081821  | -0.148338 |
| H    | 0.412434  | -1.880038 | 0.205614  |
| C    | -1.015941 | 0.089477  | -0.006934 |
| N    | -2.172698 | 0.084454  | -0.074650 |

**s-P1** (cyanovinylalcohol isomer + H)**Table 22** Cartesian coordinates in Å of the cyanovinylalcohol isomer structure optimized at rev-DSDPBEP86-GD3BJ/jun-cc-pVTZ level of theory.

| Atom | X         | Y         | Z         |
|------|-----------|-----------|-----------|
| C    | -0.928205 | -0.382036 | 0.000000  |
| H    | -0.737944 | -1.447545 | 0.000000  |
| C    | 0.066381  | 0.520301  | 0.000000  |
| H    | -0.130291 | 1.586302  | 0.000000  |
| O    | -2.245078 | -0.107506 | 0.000000  |
| H    | -2.383240 | 0.847574  | -0.000000 |
| C    | 1.427541  | 0.100522  | 0.000000  |
| N    | 2.545400  | -0.222715 | -0.000000 |

**s-P2** (cyanovinylalcohol isomer + H)**Table 23** Cartesian coordinates in Å of the cyanovinylalcohol isomer structure optimized at rev-DSDPBEP86-GD3BJ/jun-cc-pVTZ level of theory.

| Atom | X         | Y         | Z         |
|------|-----------|-----------|-----------|
| C    | 0.443981  | 0.039262  | -0.000001 |
| C    | 1.198529  | 1.140439  | 0.000000  |
| H    | 2.276862  | 1.062360  | 0.000002  |
| O    | 0.990152  | -1.212171 | -0.000000 |
| H    | 0.291376  | -1.874294 | 0.000005  |
| C    | -0.994930 | 0.104485  | -0.000001 |
| N    | -2.157744 | 0.098859  | 0.000001  |
| H    | 0.729281  | 2.112173  | 0.000000  |

**s-P3** (cyanoacetaldehyde + H)**Table 24** Cartesian coordinates in Å of the cyanoacetaldehyde structure optimized at rev-DSDPBEP86-GD3BJ/jun-cc-pVTZ level of theory.

| Atom | X         | Y         | Z         |
|------|-----------|-----------|-----------|
| C    | -1.345923 | 0.104809  | -0.027948 |
| N    | -2.377393 | -0.417343 | -0.125136 |
| C    | -0.023598 | 0.714489  | 0.099916  |
| H    | 0.191721  | 1.363573  | -0.749015 |
| H    | -0.003508 | 1.324207  | 1.009576  |
| C    | 1.076489  | -0.337387 | 0.222890  |
| O    | 2.175451  | -0.176213 | -0.242639 |
| H    | 0.808118  | -1.248133 | 0.787358  |

**s-P4** (acetylcyanide + H)**Table 25** Cartesian coordinates in Å of the acetylcyanide structure optimized at rev-DSDPBEP86-GD3BJ/jun-cc-pVTZ level of theory.

| Atom | X         | Y         | Z         |
|------|-----------|-----------|-----------|
| C    | 0.435388  | 0.206437  | -0.000013 |
| O    | 0.875395  | 1.331535  | -0.000061 |
| C    | -1.033749 | -0.009358 | 0.000014  |
| N    | -2.179015 | -0.205280 | 0.000032  |
| C    | 1.253779  | -1.050580 | 0.000026  |
| H    | 1.002871  | -1.648213 | 0.879919  |
| H    | 1.002857  | -1.648277 | -0.879819 |
| H    | 2.311705  | -0.797822 | 0.000008  |

**s-P5** (Formylcyanide + CH<sub>3</sub>)**Table 26** Cartesian coordinates in Å of the Formylcyanide structure optimized at rev-DSDPBEP86-GD3BJ/jun-cc-pVTZ level of theory.

| Atom | X         | Y         | Z         |
|------|-----------|-----------|-----------|
| C    | -0.692079 | 0.426205  | -0.000021 |
| O    | -1.562173 | -0.407499 | 0.000045  |
| C    | 0.737630  | 0.069129  | -0.000014 |
| N    | 1.873815  | -0.174115 | -0.000009 |
| H    | -0.892626 | 1.506792  | -0.000090 |

**Table 27** Cartesian coordinates in Å of the CH<sub>3</sub> structure optimized at rev-DSDPBEP86-GD3BJ/jun-cc-pVTZ level of theory.

| Atom | X         | Y         | Z         |
|------|-----------|-----------|-----------|
| C    | -0.204697 | 0.140730  | -0.218631 |
| H    | 0.303637  | -0.757915 | 0.092664  |
| H    | 0.303657  | 0.859632  | -0.841227 |
| H    | -1.221388 | 0.320469  | 0.092664  |

**s-P6** (Vinylcyanide + OH)**Table 28** Cartesian coordinates in Å of the vinylcyanide structure optimized at rev-DSDPBEP86-GD3BJ/jun-cc-pVTZ level of theory.

| Atom | X         | Y         | Z        |
|------|-----------|-----------|----------|
| C    | -0.608242 | 0.671357  | 0.000006 |
| H    | -1.181236 | -0.247803 | 0.000007 |
| C    | 0.727830  | 0.662097  | 0.000002 |
| H    | 1.269248  | -0.274564 | 0.000000 |
| H    | 1.298781  | 1.581579  | 0.000001 |
| C    | -1.365754 | 1.888472  | 0.000009 |
| N    | -1.997712 | 2.864467  | 0.000012 |

**Table 29** Cartesian coordinates in Å of the OH structure optimized at rev-DSDPBEP86-GD3BJ/jun-cc-pVTZ level of theory.

| Atom | X         | Y        | Z         |
|------|-----------|----------|-----------|
| O    | -1.121951 | 0.449697 | -0.040988 |
| H    | -1.446314 | 1.365670 | -0.040988 |

**s-P7** (Cyanovinylacohol isomer + H)

**Table 30** Cartesian coordinates in Å of the Cyanovinylacohol isomer structure optimized at rev-DSDPBEP86-GD3BJ/jun-cc-pVTZ level of theory.

| Atom | X         | Y         | Z         |
|------|-----------|-----------|-----------|
| C    | 1.186962  | 0.447476  | -0.000000 |
| C    | -0.062691 | 0.933629  | 0.000000  |
| O    | 1.443243  | -0.876551 | 0.000001  |
| H    | 2.392715  | -1.026824 | -0.000003 |
| H    | -0.208611 | 2.003819  | 0.000000  |
| C    | -1.216174 | 0.096418  | 0.000000  |
| N    | -2.173932 | -0.564025 | -0.000000 |
| H    | 2.038897  | 1.118445  | -0.000000 |

### 2.1.2 *anti*-VyA + CN

#### CN (Cyanide radical)

**Table 31** Cartesian coordinates in Å of the cyanide radical structure optimized at rev-DSDPBEP86-GD3BJ/jun-cc-pVTZ level of theory.

| Atom | X         | Y        | Z        |
|------|-----------|----------|----------|
| C    | -1.875383 | 0.453789 | 0.017829 |
| N    | -0.716421 | 0.453789 | 0.017829 |

#### C<sub>2</sub>H<sub>4</sub>O (*anti*-VyA)

**Table 32** Cartesian coordinates in Å of the *anti*-Vy structure optimized at rev-DSDPBEP86-GD3BJ/jun-cc-pVTZ level of theory.

| Atom | X         | Y         | Z         |
|------|-----------|-----------|-----------|
| C    | 0.035965  | 0.414901  | 0.000010  |
| O    | -1.132689 | -0.296697 | 0.000001  |
| H    | -0.067014 | 1.495467  | 0.000038  |
| C    | 1.225337  | -0.181204 | -0.000014 |
| H    | 1.314586  | -1.259393 | -0.000042 |
| H    | 2.120535  | 0.422594  | -0.000006 |
| H    | -1.874405 | 0.312722  | 0.000028  |

#### a-Int1

**Table 33** Cartesian coordinates in Å of the **a-Int1** structure optimized at rev-DSDPBEP86-GD3BJ/jun-cc-pVTZ level of theory.

| Atom | X         | Y         | Z         |
|------|-----------|-----------|-----------|
| C    | -1.150932 | 0.386547  | -0.375960 |
| O    | -1.673440 | -0.666779 | 0.316802  |
| H    | -1.273802 | 0.390953  | -1.453333 |
| C    | 0.096160  | 0.936729  | 0.235924  |
| H    | -0.041662 | 1.053629  | 1.313575  |
| H    | 0.313950  | 1.920135  | -0.184541 |
| H    | -2.377469 | -1.073997 | -0.196910 |
| C    | 1.265314  | 0.068067  | 0.007300  |
| N    | 2.169367  | -0.628796 | -0.203783 |

### a-Int1b

**Table 34** Cartesian coordinates in Å of the **a-Int1b** structure optimized at rev-DSDPBEP86-GD3BJ/jun-cc-pVTZ level of theory.

| Atom | X         | Y         | Z         |
|------|-----------|-----------|-----------|
| C    | 0.607662  | 0.081245  | 0.484541  |
| O    | 1.606201  | -0.525769 | -0.260327 |
| H    | 0.752419  | 0.120428  | 1.561019  |
| C    | -0.106259 | 1.228763  | -0.169707 |
| H    | 0.170229  | 1.443178  | -1.195284 |
| H    | -0.407234 | 2.069767  | 0.442932  |
| H    | 1.605880  | -1.469028 | -0.065629 |
| C    | -0.847937 | -0.061981 | 0.028439  |
| N    | -1.815698 | -0.780466 | -0.084464 |

### a-Int2

**Table 35** Cartesian coordinates in Å of the **a-Int2** structure optimized at rev-DSDPBEP86-GD3BJ/jun-cc-pVTZ level of theory.

| Atom | X         | Y         | Z         |
|------|-----------|-----------|-----------|
| C    | 0.424723  | -0.018446 | 0.383703  |
| O    | 1.006460  | -1.208950 | -0.140369 |
| H    | 0.560788  | -0.108137 | 1.466272  |
| C    | 1.086852  | 1.217589  | -0.126004 |
| H    | 2.154941  | 1.311218  | 0.005584  |
| H    | 0.522218  | 2.012839  | -0.587756 |
| H    | 0.992787  | -1.145271 | -1.102593 |
| C    | -1.033056 | 0.018850  | 0.124049  |
| N    | -2.170629 | 0.053585  | -0.102315 |

### a-Int3

**Table 36** Cartesian coordinates in Å of the **a-Int3** structure optimized at rev-DSDPBEP86-GD3BJ/jun-cc-pVTZ level of theory.

| Atom | X         | Y         | Z         |
|------|-----------|-----------|-----------|
| C    | 0.988855  | -0.451602 | 0.291772  |
| O    | 2.181772  | 0.091644  | -0.250676 |
| H    | 0.700065  | -1.384477 | -0.203082 |
| C    | -0.141240 | 0.528383  | 0.246121  |
| H    | 0.057252  | 1.572710  | 0.446049  |
| H    | 2.046477  | 0.238001  | -1.192277 |
| C    | -1.461617 | 0.120365  | 0.020576  |
| N    | -2.547823 | -0.241163 | -0.175942 |
| H    | 1.225660  | -0.692625 | 1.332968  |

### a-Int4

**Table 37** Cartesian coordinates in Å of the **a-Int4** structure optimized at rev-DSDPBEP86-GD3BJ/jun-cc-pVTZ level of theory.

| Atom | X         | Y         | Z         |
|------|-----------|-----------|-----------|
| C    | 0.338179  | 0.053219  | 0.000062  |
| O    | 0.862528  | 1.306811  | 0.000292  |
| C    | 1.325205  | -1.052983 | 0.000045  |
| H    | 1.968304  | -0.991214 | 0.883150  |
| H    | 0.816834  | -2.015413 | -0.000143 |
| H    | 0.152117  | 1.959414  | 0.000287  |
| C    | -1.050149 | -0.116959 | -0.000144 |
| N    | -2.208459 | -0.235861 | -0.000314 |
| H    | 1.968528  | -0.990987 | -0.882881 |

### a-Int5

**Table 38** Cartesian coordinates in Å of the **a-Int5** structure optimized at rev-DSDPBEP86-GD3BJ/jun-cc-pVTZ level of theory.

| Atom | X         | Y         | Z         |
|------|-----------|-----------|-----------|
| C    | 0.409848  | -0.041316 | 0.380390  |
| O    | 1.041703  | -1.144416 | -0.140658 |
| C    | 1.125194  | 1.214977  | -0.154543 |
| H    | 1.065265  | 1.238867  | -1.241852 |
| H    | 0.635570  | 2.101157  | 0.248889  |
| C    | -1.038927 | 0.003264  | 0.057753  |
| N    | -2.171740 | 0.059832  | -0.186926 |
| H    | 2.168228  | 1.191981  | 0.156014  |
| H    | 0.521602  | -0.063452 | 1.472807  |

### a-TS1

**Table 39** Cartesian coordinates in Å of the **a-TS1** structure optimized at rev-DSDPBEP86-GD3BJ/jun-cc-pVTZ level of theory.

| Atom | X         | Y         | Z         |
|------|-----------|-----------|-----------|
| C    | 0.664408  | 0.096319  | 0.485392  |
| O    | 1.628091  | -0.643117 | -0.146936 |
| H    | 0.807188  | 0.131491  | 1.555878  |
| C    | -0.095778 | 1.196556  | -0.189615 |
| H    | 0.164647  | 1.419266  | -1.221126 |
| H    | -0.351939 | 2.066418  | 0.408023  |
| H    | 1.418229  | -0.726769 | -1.083829 |
| C    | -0.938690 | 0.000508  | 0.004124  |
| N    | -1.834641 | -0.786538 | -0.040410 |

### a-TS1b

**Table 40** Cartesian coordinates in Å of the **a-TS1b** structure optimized at rev-DSDPBEP86-GD3BJ/jun-cc-pVTZ level of theory.

| Atom | X         | Y         | Z         |
|------|-----------|-----------|-----------|
| C    | 0.579745  | 0.065395  | 0.458799  |
| O    | 1.577886  | -0.582191 | -0.265314 |
| H    | 0.740393  | 0.115893  | 1.535460  |
| C    | 0.020950  | 1.289451  | -0.169491 |
| H    | 0.192060  | 1.436633  | -1.225814 |
| H    | -0.304558 | 2.112406  | 0.449097  |
| H    | 1.542735  | -1.523286 | -0.062155 |
| C    | -0.829581 | -0.182495 | 0.091930  |
| N    | -1.904478 | -0.640018 | -0.123799 |

### a-TS3

**Table 41** Cartesian coordinates in Å of the **a-TS3** structure optimized at rev-DSDPBEP86-GD3BJ/jun-cc-pVTZ level of theory.

| Atom | X         | Y         | Z         |
|------|-----------|-----------|-----------|
| C    | 1.250669  | 0.421444  | -0.080454 |
| O    | 1.448643  | -0.922534 | -0.134443 |
| H    | 2.114504  | 1.008116  | 0.195654  |
| C    | -0.102803 | 0.996542  | 0.152658  |
| H    | 0.500170  | 1.057870  | -0.988633 |
| H    | -0.181906 | 1.956790  | 0.641123  |
| H    | 0.610965  | -1.384199 | 0.013819  |
| C    | -1.210093 | 0.115617  | 0.129903  |
| N    | -2.059686 | -0.679345 | 0.077561  |

### a-TS3b

**Table 42** Cartesian coordinates in Å of the **a-TS3b** structure optimized at rev-DSDPBEP86-GD3BJ/jun-cc-pVTZ level of theory.

| Atom | X         | Y         | Z         |
|------|-----------|-----------|-----------|
| C    | 0.255727  | 0.377936  | 0.511840  |
| O    | 1.217745  | -1.312316 | -0.036073 |
| H    | 0.515450  | 0.158045  | 1.537357  |
| C    | 1.023432  | 1.184436  | -0.249777 |
| H    | 0.702847  | 1.496782  | -1.234800 |
| H    | 1.999153  | 1.490612  | 0.098749  |
| H    | 1.018149  | -1.323017 | -0.985933 |
| C    | -1.099169 | 0.063911  | 0.121422  |
| N    | -2.190669 | -0.166943 | -0.188721 |



**a-TS4****Table 43** Cartesian coordinates in Å of the **a-TS4** structure optimized at rev-DSDPBEP86-GD3BJ/jun-cc-pVTZ level of theory.

| Atom | X         | Y         | Z         |
|------|-----------|-----------|-----------|
| C    | 0.932324  | -0.356049 | 0.095185  |
| O    | 2.211832  | 0.008191  | -0.097272 |
| H    | 0.743844  | -1.349749 | 0.485472  |
| C    | -0.068127 | 0.520948  | -0.119763 |
| H    | 0.123225  | 1.456674  | -0.627959 |
| H    | -0.169327 | 1.569052  | 1.401728  |
| H    | 2.800709  | -0.710917 | 0.150147  |
| C    | -1.424189 | 0.056413  | -0.047216 |
| N    | -2.520454 | -0.317557 | 0.002945  |

**a-TS5****Table 44** Cartesian coordinates in Å of the **a-TS5** structure optimized at rev-DSDPBEP86-GD3BJ/jun-cc-pVTZ level of theory.

| Atom | X         | Y         | Z         |
|------|-----------|-----------|-----------|
| C    | -0.905315 | -0.314056 | -0.082033 |
| O    | -2.182927 | 0.122117  | -0.089299 |
| H    | -0.800137 | -1.097928 | 1.581223  |
| C    | 0.107487  | 0.562830  | 0.086076  |
| H    | -0.086297 | 1.593702  | 0.348374  |
| H    | -2.782624 | -0.625632 | -0.169561 |
| C    | 1.456715  | 0.114741  | -0.008562 |
| N    | 2.556411  | -0.243981 | -0.082571 |
| H    | -0.715719 | -1.320310 | -0.440533 |

**a-TS8****Table 45** Cartesian coordinates in Å of the **a-TS8** structure optimized at rev-DSDPBEP86-GD3BJ/jun-cc-pVTZ level of theory.

| Atom | X         | Y         | Z         |
|------|-----------|-----------|-----------|
| C    | 0.973209  | -0.456428 | -0.014424 |
| O    | 2.161746  | -0.170047 | -0.093295 |
| H    | 0.648941  | -1.485026 | 0.189502  |
| C    | -0.072654 | 0.631607  | -0.071866 |
| H    | 0.065333  | 1.226198  | -0.977742 |
| H    | 0.124238  | 1.302403  | 0.776609  |
| H    | 2.684898  | 0.765786  | 0.910022  |
| C    | -1.439801 | 0.121175  | -0.002176 |
| N    | -2.511700 | -0.318159 | 0.054110  |

### a-TS10

**Table 46** Cartesian coordinates in Å of the **a-TS10** structure optimized at rev-DSDPBEP86-GD3BJ/jun-cc-pVTZ level of theory.

| Atom | X         | Y         | Z         |
|------|-----------|-----------|-----------|
| C    | 0.302171  | -0.068947 | 0.490469  |
| O    | 0.997951  | -1.130198 | -0.185764 |
| H    | 0.385532  | -0.151275 | 1.574392  |
| C    | 1.221740  | 0.927431  | -0.157514 |
| H    | 0.828727  | 1.513614  | -0.979728 |
| H    | 1.998643  | 1.360990  | 0.460350  |
| H    | 1.704876  | -0.199318 | -0.678716 |
| C    | -1.111398 | 0.022089  | 0.103609  |
| N    | -2.229604 | 0.112745  | -0.193324 |

### a-TS12

**Table 47** Cartesian coordinates in Å of the **a-TS12** structure optimized at rev-DSDPBEP86-GD3BJ/jun-cc-pVTZ level of theory.

| Atom | X         | Y         | Z         |
|------|-----------|-----------|-----------|
| C    | 0.334038  | -0.054029 | 0.133156  |
| O    | 0.929903  | -1.280255 | -0.049322 |
| H    | 0.732929  | 0.651726  | 1.118530  |
| C    | 1.132907  | 1.179164  | -0.041148 |
| H    | 0.638686  | 2.112256  | -0.261441 |
| H    | 2.206066  | 1.076333  | -0.087525 |
| H    | 1.472745  | -1.238061 | -0.848368 |
| C    | -1.091167 | 0.006170  | 0.023773  |
| N    | -2.249515 | 0.075763  | -0.029666 |

### a-TS13

**Table 48** Cartesian coordinates in Å of the **a-TS13** structure optimized at rev-DSDPBEP86-GD3BJ/jun-cc-pVTZ level of theory.

| Atom | X         | Y         | Z         |
|------|-----------|-----------|-----------|
| C    | 0.404534  | 0.110560  | 0.080546  |
| O    | 0.933802  | 1.210862  | 0.154848  |
| C    | 1.145341  | -1.181204 | -0.032381 |
| H    | 2.198169  | -1.021530 | 0.189752  |
| H    | 0.716415  | -1.928851 | 0.637712  |
| H    | 1.425798  | 1.899735  | -1.094031 |
| C    | -1.063633 | 0.018064  | 0.003480  |
| N    | -2.214645 | -0.085852 | -0.057717 |
| H    | 1.036995  | -1.560560 | -1.054883 |

**a-TS14****Table 49** Cartesian coordinates in Å of the **a-TS14** structure optimized at rev-DSDPBEP86-GD3BJ/jun-cc-pVTZ level of theory.

| Atom | X         | Y         | Z         |
|------|-----------|-----------|-----------|
| C    | -0.427525 | 0.205295  | 0.055679  |
| O    | -0.882098 | 1.320709  | -0.116335 |
| C    | -1.236125 | -1.069884 | -0.062106 |
| H    | -1.198752 | -1.372550 | -1.112793 |
| H    | -0.815043 | -1.873649 | 0.540853  |
| C    | 1.052554  | -0.007870 | 0.004781  |
| N    | 2.195794  | -0.202452 | -0.061282 |
| H    | -2.268772 | -0.870287 | 0.216498  |
| H    | -0.364628 | 0.202725  | 1.724963  |

**a-TS15****Table 50** Cartesian coordinates in Å of the **a-TS15** structure optimized at rev-DSDPBEP86-GD3BJ/jun-cc-pVTZ level of theory.

| Atom | X         | Y         | Z         |
|------|-----------|-----------|-----------|
| C    | -0.310687 | 0.527182  | 0.408540  |
| O    | -0.868530 | 1.354743  | -0.294369 |
| C    | -1.281700 | -1.294700 | -0.095820 |
| H    | -1.035936 | -1.322914 | -1.148311 |
| H    | -0.764334 | -1.986617 | 0.557108  |
| C    | 1.047279  | 0.024054  | 0.078946  |
| N    | 2.112807  | -0.374459 | -0.155865 |
| H    | -2.289028 | -1.004616 | 0.168934  |
| H    | -0.591439 | 0.351855  | 1.457777  |

**a-TS16****Table 51** Cartesian coordinates in Å of the **a-TS16** structure optimized at rev-DSDPBEP86-GD3BJ/jun-cc-pVTZ level of theory.

| Atom | X         | Y         | Z         |
|------|-----------|-----------|-----------|
| C    | 0.436290  | 0.033779  | 0.059402  |
| O    | 0.996474  | -1.197203 | -0.142723 |
| H    | 0.329343  | -0.013623 | 1.856427  |
| C    | 1.172628  | 1.151842  | -0.077762 |
| H    | 0.693242  | 2.117949  | -0.053825 |
| H    | 2.248480  | 1.081821  | -0.148338 |
| H    | 0.412434  | -1.880038 | 0.205614  |
| C    | -1.015941 | 0.089477  | -0.006934 |
| N    | -2.172698 | 0.084454  | -0.074650 |

**a-P1** (cyanovinylalcohol isomer + H)**Table 52** Cartesian coordinates in Å of the cyanovinylalcohol isomer structure optimized at rev-DSDPBEP86-GD3BJ/jun-cc-pVTZ level of theory.

| Atom | X         | Y         | Z         |
|------|-----------|-----------|-----------|
| C    | -2.382269 | 0.945131  | -0.000362 |
| H    | -2.955911 | 0.024193  | -0.000477 |
| C    | -1.042183 | 0.938093  | -0.000079 |
| H    | -0.479726 | 1.862579  | 0.000035  |
| O    | -3.073123 | 2.105766  | -0.000511 |
| H    | -4.016875 | 1.922791  | -0.000715 |
| C    | -0.329433 | -0.294769 | 0.000078  |
| N    | 0.266749  | -1.294247 | 0.000210  |

**a-P2** (cyanovinylalcohol isomer + H)**Table 53** Cartesian coordinates in Å of the cyanovinylalcohol isomer structure optimized at rev-DSDPBEP86-GD3BJ/jun-cc-pVTZ level of theory.

| Atom | X         | Y         | Z         |
|------|-----------|-----------|-----------|
| C    | 0.443981  | 0.039262  | -0.000001 |
| C    | 1.198529  | 1.140439  | 0.000000  |
| H    | 2.276862  | 1.062360  | 0.000002  |
| O    | 0.990152  | -1.212171 | -0.000000 |
| H    | 0.291376  | -1.874294 | 0.000005  |
| C    | -0.994930 | 0.104485  | -0.000001 |
| N    | -2.157744 | 0.098859  | 0.000001  |
| H    | 0.729281  | 2.112173  | 0.000000  |

**a-P3** (cyanoacetaldehyde + H)**Table 53** Cartesian coordinates in Å of the cyanoacetaldehyde structure optimized at rev-DSDPBEP86-GD3BJ/jun-cc-pVTZ level of theory.

| Atom | X         | Y         | Z         |
|------|-----------|-----------|-----------|
| C    | -1.345923 | 0.104809  | -0.027948 |
| N    | -2.377393 | -0.417343 | -0.125136 |
| C    | -0.023598 | 0.714489  | 0.099916  |
| H    | 0.191721  | 1.363573  | -0.749015 |
| H    | -0.003508 | 1.324207  | 1.009576  |
| C    | 1.076489  | -0.337387 | 0.222890  |
| O    | 2.175451  | -0.176213 | -0.242639 |
| H    | 0.808118  | -1.248133 | 0.787358  |

**a-P4 (acetylcyanide + H)****Table 54** Cartesian coordinates in Å of the acetylcyanide structure optimized at rev-DSDPBEP86-GD3BJ/jun-cc-pVTZ level of theory.

| Atom | X         | Y         | Z         |
|------|-----------|-----------|-----------|
| C    | 0.435388  | 0.206437  | -0.000013 |
| O    | 0.875395  | 1.331535  | -0.000061 |
| C    | -1.033749 | -0.009358 | 0.000014  |
| N    | -2.179015 | -0.205280 | 0.000032  |
| C    | 1.253779  | -1.050580 | 0.000026  |
| H    | 1.002871  | -1.648213 | 0.879919  |
| H    | 1.002857  | -1.648277 | -0.879819 |
| H    | 2.311705  | -0.797822 | 0.000008  |

**a-P5 (Formylcyanide + CH<sub>3</sub>)****Table 55** Cartesian coordinates in Å of the Formylcyanide structure optimized at rev-DSDPBEP86-GD3BJ/jun-cc-pVTZ level of theory.

| Atom | X         | Y         | Z         |
|------|-----------|-----------|-----------|
| C    | -0.692079 | 0.426205  | -0.000021 |
| O    | -1.562173 | -0.407499 | 0.000045  |
| C    | 0.737630  | 0.069129  | -0.000014 |
| N    | 1.873815  | -0.174115 | -0.000009 |
| H    | -0.892626 | 1.506792  | -0.000090 |

**Table 56** Cartesian coordinates in Å of the CH<sub>3</sub> structure optimized at rev-DSDPBEP86-GD3BJ/jun-cc-pVTZ level of theory.

| Atom | X         | Y         | Z         |
|------|-----------|-----------|-----------|
| C    | -0.204697 | 0.140730  | -0.218631 |
| H    | 0.303637  | -0.757915 | 0.092664  |
| H    | 0.303657  | 0.859632  | -0.841227 |
| H    | -1.221388 | 0.320469  | 0.092664  |

**a-P6 (Vinylcyanide + OH)****Table 57** Cartesian coordinates in Å of the vinylcyanide structure optimized at rev-DSDPBEP86-GD3BJ/jun-cc-pVTZ level of theory.

| Atom | X         | Y         | Z        |
|------|-----------|-----------|----------|
| C    | -0.608242 | 0.671357  | 0.000006 |
| H    | -1.181236 | -0.247803 | 0.000007 |
| C    | 0.727830  | 0.662097  | 0.000002 |
| H    | 1.269248  | -0.274564 | 0.000000 |
| H    | 1.298781  | 1.581579  | 0.000001 |
| C    | -1.365754 | 1.888472  | 0.000009 |
| N    | -1.997712 | 2.864467  | 0.000012 |

**Table 57** Cartesian coordinates in Å of the OH structure optimized at rev-DSDPBEP86-GD3BJ/jun-cc-pVTZ level of theory.

| Atom | X         | Y        | Z         |
|------|-----------|----------|-----------|
| O    | -1.121951 | 0.449697 | -0.040988 |
| H    | -1.446314 | 1.365670 | -0.040988 |

**a-P7** (Cyanovinylacohol isomer + H)

**Table 58** Cartesian coordinates in Å of the Cyanovinylacohol isomer structure optimized at rev-DSDPBEP86-GD3BJ/jun-cc-pVTZ level of theory.

| Atom | X         | Y        | Z         |
|------|-----------|----------|-----------|
| C    | -2.378164 | 1.002522 | 0.000021  |
| C    | -1.037611 | 1.032446 | 0.001148  |
| O    | -3.122332 | 2.127217 | 0.000016  |
| H    | -4.056895 | 1.902113 | -0.000884 |
| H    | -0.492664 | 0.099905 | 0.001093  |
| C    | -0.293089 | 2.247818 | 0.002424  |
| N    | 0.338404  | 3.224906 | 0.003476  |
| H    | -2.907880 | 0.056270 | -0.000931 |

### 3 Abstraction reactions

#### 3.1 C attack

##### 3.1.1 *Syn-VyA* + CN

CN (Cyanide radical)

**Table 59** Cartesian coordinates in Å of the cyanide radical structure optimized at rev-DSDPBEP86-GD3BJ/jun-cc-pVTZ level of theory.

| Atom | X         | Y        | Z        |
|------|-----------|----------|----------|
| C    | -1.875383 | 0.453789 | 0.017829 |
| N    | -0.716421 | 0.453789 | 0.017829 |

C<sub>2</sub>H<sub>4</sub>O (*syn-VyA*)

**Table 60** Cartesian coordinates in Å of the *syn-Vy* structure optimized at rev-DSDPBEP86-GD3BJ/jun-cc-pVTZ level of theory.

| Atom | X         | Y         | Z         |
|------|-----------|-----------|-----------|
| C    | -0.036309 | 0.442827  | 0.000002  |
| O    | 1.206308  | -0.115176 | -0.000002 |
| H    | 0.027835  | 1.523455  | -0.000001 |
| C    | -1.199885 | -0.207586 | 0.000001  |
| H    | -1.253910 | -1.290335 | -0.000002 |
| H    | -2.123655 | 0.351690  | -0.000006 |
| H    | 1.116437  | -1.074853 | 0.000005  |

**s-Int1A**

**Table 61** Cartesian coordinates in Å of the **s-Int1A** structure optimized at rev-DSDPBEP86-GD3BJ/jun-cc-pVTZ level of theory.

| Atom | X         | Y         | Z         |
|------|-----------|-----------|-----------|
| C    | -1.223970 | 0.346877  | 0.284567  |
| O    | -1.480884 | -0.913455 | -0.162057 |
| H    | -2.121561 | 0.940412  | 0.387136  |
| C    | 0.040897  | 1.030829  | -0.153977 |
| H    | 0.211418  | 1.921086  | 0.454209  |
| H    | -0.010268 | 1.353709  | -1.203771 |
| H    | -0.655988 | -1.414046 | -0.216449 |
| C    | 1.190800  | 0.128598  | -0.026067 |
| N    | 2.045701  | -0.651991 | 0.057004  |

### s-Int1bA

**Table 62** Cartesian coordinates in Å of the **s-Int1bA** structure optimized at rev-DSDPBEP86-GD3BJ/jun-cc-pVTZ level of theory.

| Atom | X         | Y         | Z         |
|------|-----------|-----------|-----------|
| C    | 0.608031  | 0.077743  | 0.482179  |
| O    | 1.603376  | -0.532773 | -0.264103 |
| H    | 0.753870  | 0.115309  | 1.558569  |
| C    | -0.101622 | 1.228876  | -0.170371 |
| H    | 0.174886  | 1.443105  | -1.195982 |
| H    | -0.398541 | 2.070548  | 0.443327  |
| H    | 1.599009  | -1.476259 | -0.070555 |
| C    | -0.848535 | -0.058934 | 0.027189  |
| N    | -1.819387 | -0.773261 | -0.085589 |

### s-TS1A

**Table 63** Cartesian coordinates in Å of the **s-TS1A** structure optimized at rev-DSDPBEP86-GD3BJ/jun-cc-pVTZ level of theory.

| Atom | X         | Y         | Z         |
|------|-----------|-----------|-----------|
| C    | 0.130909  | 0.303384  | -0.000883 |
| O    | 1.315944  | -0.042578 | -0.331837 |
| H    | -0.030529 | 1.335571  | 0.304535  |
| C    | -0.895449 | -0.668380 | 0.049054  |
| H    | -1.045294 | -1.330132 | -0.792009 |
| H    | -1.746029 | -0.515125 | 0.702383  |
| H    | 1.233527  | -1.132287 | -0.054210 |
| C    | 0.470202  | -2.218175 | 0.660811  |
| N    | 0.170111  | -3.185072 | 1.241917  |

### s-TS1bA

**Table 64** Cartesian coordinates in Å of the **s-TS1bA** structure optimized at rev-DSDPBEP86-GD3BJ/jun-cc-pVTZ level of theory.

| Atom | X         | Y         | Z         |
|------|-----------|-----------|-----------|
| C    | 0.664408  | 0.096319  | 0.485392  |
| O    | 1.628091  | -0.643117 | -0.146936 |
| H    | 0.807188  | 0.131491  | 1.555878  |
| C    | -0.095778 | 1.196556  | -0.189615 |
| H    | 0.164647  | 1.419266  | -1.221126 |
| H    | -0.351939 | 2.066418  | 0.408023  |
| H    | 1.418229  | -0.726769 | -1.083829 |
| C    | -0.938690 | 0.000508  | 0.004124  |
| N    | -1.834641 | -0.786538 | -0.040410 |



### s-TS1cA

**Table 65** Cartesian coordinates in Å of the s-TS1cA structure optimized at rev-DSDPBEP86-GD3BJ/jun-cc-pVTZ level of theory.

| Atom | X         | Y         | Z         |
|------|-----------|-----------|-----------|
| C    | 0.579745  | 0.065395  | 0.458799  |
| O    | 1.577886  | -0.582191 | -0.265314 |
| H    | 0.740393  | 0.115893  | 1.535460  |
| C    | 0.020950  | 1.289451  | -0.169491 |
| H    | 0.192060  | 1.436633  | -1.225814 |
| H    | -0.304558 | 2.112406  | 0.449097  |
| H    | 1.542735  | -1.523286 | -0.062155 |
| C    | -0.829581 | -0.182495 | 0.091930  |
| N    | -1.904478 | -0.640018 | -0.123799 |

### s-TS2A

**Table 66** Cartesian coordinates in Å of the s-TS2A structure optimized at rev-DSDPBEP86-GD3BJ/jun-cc-pVTZ level of theory.

| Atom | X         | Y         | Z         |
|------|-----------|-----------|-----------|
| C    | 0.069853  | 0.438801  | -0.335670 |
| O    | 1.243948  | -0.188849 | -0.225010 |
| H    | 0.182150  | 1.503510  | -0.820652 |
| C    | -1.156256 | 0.063419  | 0.037639  |
| H    | -1.365697 | -0.952973 | 0.352321  |
| H    | -1.967323 | 0.773367  | -0.030503 |
| H    | 1.239471  | -0.770239 | 0.545814  |
| C    | 0.145630  | 2.919826  | -0.238803 |
| N    | -0.029379 | 3.519241  | 0.756247  |

### s-TS3A

**Table 67** Cartesian coordinates in Å of the s-TS3A structure optimized at rev-DSDPBEP86-GD3BJ/jun-cc-pVTZ level of theory.

| Atom | X         | Y         | Z         |
|------|-----------|-----------|-----------|
| C    | -0.193222 | 0.476604  | 0.065339  |
| O    | 1.045125  | 0.052372  | -0.253161 |
| H    | -0.227896 | 1.551060  | 0.197349  |
| C    | -1.270558 | -0.289528 | 0.269478  |
| H    | -1.433198 | -1.326715 | 0.006501  |
| H    | -2.257123 | 0.325340  | 0.612143  |
| H    | 1.039488  | -0.902539 | -0.394914 |
| C    | -3.237355 | 1.228171  | 0.090881  |
| N    | -3.823210 | 1.946020  | -0.613150 |

### s-TS4A

**Table 68** Cartesian coordinates in Å of the s-TS4A structure optimized at rev-DSDPBEP86-GD3BJ/jun-cc-pVTZ level of theory.

| Atom | X         | Y         | Z         |
|------|-----------|-----------|-----------|
| C    | -0.050678 | 0.231212  | 0.039101  |
| O    | 1.028778  | -0.525085 | 0.209067  |
| H    | 0.203374  | 1.279544  | -0.105955 |
| C    | -1.333780 | -0.155453 | -0.067900 |
| H    | -1.541405 | -1.398835 | -0.118090 |
| H    | -2.208883 | 0.461544  | 0.077891  |
| H    | 0.771430  | -1.441110 | 0.427101  |
| C    | -1.162462 | -2.597641 | 0.431178  |
| N    | -0.282593 | -3.213641 | 0.896211  |

### s-P1A

**Table 69** Cartesian coordinates in Å of the s-P1A structure optimized at rev-DSDPBEP86-GD3BJ/jun-cc-pVTZ level of theory.

| Atom | X         | Y         | Z         |
|------|-----------|-----------|-----------|
| C    | 0.059208  | 0.454794  | -0.000002 |
| O    | 1.125311  | -0.131781 | 0.000001  |
| H    | 0.025738  | 1.559621  | -0.000000 |
| C    | -1.214261 | -0.219153 | -0.000002 |
| H    | -1.236609 | -1.300392 | -0.000001 |
| H    | -2.139004 | 0.341785  | -0.000003 |

**Table 70** Cartesian coordinates in Å of HCN structure optimized at rev-DSDPBEP86-GD3BJ/jun-cc-pVTZ level of theory.

| Atom | X         | Y        | Z         |
|------|-----------|----------|-----------|
| C    | -0.000000 | 0.000000 | -0.628545 |
| N    | -0.000000 | 0.000000 | 0.528914  |
| H    | -0.000000 | 0.000000 | -1.695936 |

### s-P2A

**Table 71** Cartesian coordinates in Å of the s-P2A structure optimized at rev-DSDPBEP86-GD3BJ/jun-cc-pVTZ level of theory.

| Atom | X         | Y         | Z         |
|------|-----------|-----------|-----------|
| C    | -0.054042 | 0.069429  | 0.138012  |
| O    | 1.052857  | -0.543230 | -0.283056 |
| C    | -1.321854 | -0.225732 | -0.040456 |
| H    | -1.609242 | -1.182332 | -0.469608 |
| H    | -2.091478 | 0.470355  | 0.257383  |
| H    | 1.732745  | -0.481923 | 0.397723  |

**Table 72** Cartesian coordinates in Å of HCN structure optimized at rev-DSDPBEP86-GD3BJ/jun-cc-pVTZ level of theory.

| Atom | X         | Y        | Z         |
|------|-----------|----------|-----------|
| C    | -0.000000 | 0.000000 | -0.628545 |
| N    | -0.000000 | 0.000000 | 0.528914  |
| H    | -0.000000 | 0.000000 | -1.695936 |

**s-P3A**

**Table 73** Cartesian coordinates in Å of the **s-P3A** structure optimized at rev-DSDPBEP86-GD3BJ/jun-cc-pVTZ level of theory.

| Atom | X         | Y         | Z         |
|------|-----------|-----------|-----------|
| C    | -0.012611 | 0.418788  | -0.000007 |
| O    | 1.271664  | -0.072020 | 0.000002  |
| H    | -0.003559 | 1.502352  | 0.000004  |
| C    | -1.127518 | -0.263480 | -0.000002 |
| H    | -1.501967 | -1.271953 | 0.000002  |
| H    | 1.234468  | -1.035354 | 0.000004  |

**Table 74** Cartesian coordinates in Å of HCN structure optimized at rev-DSDPBEP86-GD3BJ/jun-cc-pVTZ level of theory.

| Atom | X         | Y        | Z         |
|------|-----------|----------|-----------|
| C    | -0.000000 | 0.000000 | -0.628545 |
| N    | -0.000000 | 0.000000 | 0.528914  |
| H    | -0.000000 | 0.000000 | -1.695936 |

**s-P4A**

**Table 75** Cartesian coordinates in Å of the **s-P4A** structure optimized at rev-DSDPBEP86-GD3BJ/jun-cc-pVTZ level of theory.

| Atom | X         | Y         | Z         |
|------|-----------|-----------|-----------|
| C    | -0.004196 | 0.478756  | -0.000000 |
| O    | 1.213723  | -0.136214 | 0.000004  |
| H    | 0.104127  | 1.561250  | -0.000002 |
| C    | -1.179311 | -0.095034 | -0.000003 |
| H    | -2.211761 | 0.201486  | -0.000001 |
| H    | 1.068150  | -1.089887 | 0.000002  |

**Table 76** Cartesian coordinates in Å of HCN structure optimized at rev-DSDPBEP86-GD3BJ/jun-cc-pVTZ level of theory.

| Atom | X         | Y        | Z         |
|------|-----------|----------|-----------|
| C    | -0.000000 | 0.000000 | -0.628545 |
| N    | -0.000000 | 0.000000 | 0.528914  |
| H    | -0.000000 | 0.000000 | -1.695936 |

### 3.1.2 Anti-VyA + CN

#### CN (Cyanide radical)

**Table 77** Cartesian coordinates in Å of the cyanide radical structure optimized at rev-DSDPBEP86-GD3BJ/jun-cc-pVTZ level of theory.

| Atom | X         | Y        | Z        |
|------|-----------|----------|----------|
| C    | -1.875383 | 0.453789 | 0.017829 |
| N    | -0.716421 | 0.453789 | 0.017829 |

#### C<sub>2</sub>H<sub>4</sub>O (*anti-VyA*)

**Table 78** Cartesian coordinates in Å of the *anti-Vy* structure optimized at rev-DSDPBEP86-GD3BJ/jun-cc-pVTZ level of theory.

| Atom | X         | Y         | Z         |
|------|-----------|-----------|-----------|
| C    | 0.035965  | 0.414901  | 0.000010  |
| O    | -1.132689 | -0.296697 | 0.000001  |
| H    | -0.067014 | 1.495467  | 0.000038  |
| C    | 1.225337  | -0.181204 | -0.000014 |
| H    | 1.314586  | -1.259393 | -0.000042 |
| H    | 2.120535  | 0.422594  | -0.000006 |
| H    | -1.874405 | 0.312722  | 0.000028  |

#### a-Int1A

**Table 79** Cartesian coordinates in Å of the **a-Int1A** structure optimized at rev-DSDPBEP86-GD3BJ/jun-cc-pVTZ level of theory.

| Atom | X         | Y         | Z         |
|------|-----------|-----------|-----------|
| C    | -1.150932 | 0.386547  | -0.375960 |
| O    | -1.673440 | -0.666779 | 0.316802  |
| H    | -1.273802 | 0.390953  | -1.453333 |
| C    | 0.096160  | 0.936729  | 0.235924  |
| H    | -0.041662 | 1.053629  | 1.313575  |
| H    | 0.313950  | 1.920135  | -0.184541 |
| H    | -2.377469 | -1.073997 | -0.196910 |
| C    | 1.265314  | 0.068067  | 0.007300  |
| N    | 2.169367  | -0.628796 | -0.203783 |

### a-Int1bA

**Table 80** Cartesian coordinates in Å of the **a-Int1bA** structure optimized at rev-DSDPBEP86-GD3BJ/jun-cc-pVTZ level of theory.

| Atom | X         | Y         | Z         |
|------|-----------|-----------|-----------|
| C    | 0.607662  | 0.081245  | 0.484541  |
| O    | 1.606201  | -0.525769 | -0.260327 |
| H    | 0.752419  | 0.120428  | 1.561019  |
| C    | -0.106259 | 1.228763  | -0.169707 |
| H    | 0.170229  | 1.443178  | -1.195284 |
| H    | -0.407234 | 2.069767  | 0.442932  |
| H    | 1.605880  | -1.469028 | -0.065629 |
| C    | -0.847937 | -0.061981 | 0.028439  |
| N    | -1.815698 | -0.780466 | -0.084464 |

### a-TS1A

**Table 81** Cartesian coordinates in Å of the **a-TS1A** structure optimized at rev-DSDPBEP86-GD3BJ/jun-cc-pVTZ level of theory.

| Atom | X         | Y         | Z         |
|------|-----------|-----------|-----------|
| C    | 2.159762  | 0.075152  | 0.102454  |
| H    | 2.810200  | 0.866839  | -0.238828 |
| H    | 2.574629  | -0.837506 | 0.507176  |
| C    | 0.750901  | 0.229138  | 0.021189  |
| H    | 0.283716  | 1.133043  | -0.380200 |
| O    | -0.011734 | -0.683017 | 0.414278  |
| H    | -1.089903 | -0.313440 | 0.241563  |
| C    | -2.164168 | 0.628275  | -0.182312 |
| N    | -2.863175 | -0.244210 | 0.193974  |

### a-TS1bA

**Table 82** Cartesian coordinates in Å of the **a-TS1bA** structure optimized at rev-DSDPBEP86-GD3BJ/jun-cc-pVTZ level of theory.

| Atom | X         | Y         | Z         |
|------|-----------|-----------|-----------|
| C    | 0.664408  | 0.096319  | 0.485392  |
| O    | 1.628091  | -0.643117 | -0.146936 |
| H    | 0.807188  | 0.131491  | 1.555878  |
| C    | -0.095778 | 1.196556  | -0.189615 |
| H    | 0.164647  | 1.419266  | -1.221126 |
| H    | -0.351939 | 2.066418  | 0.408023  |
| H    | 1.418229  | -0.726769 | -1.083829 |
| C    | -0.938690 | 0.000508  | 0.004124  |
| N    | -1.834641 | -0.786538 | -0.040410 |

### a-TS1cA

**Table 83** Cartesian coordinates in Å of the **a-TS1cA** structure optimized at rev-DSDPBEP86-GD3BJ/jun-cc-pVTZ level of theory.

| Atom | X         | Y         | Z         |
|------|-----------|-----------|-----------|
| C    | 0.579745  | 0.065395  | 0.458799  |
| O    | 1.577886  | -0.582191 | -0.265314 |
| H    | 0.740393  | 0.115893  | 1.535460  |
| C    | 0.020950  | 1.289451  | -0.169491 |
| H    | 0.192060  | 1.436633  | -1.225814 |
| H    | -0.304558 | 2.112406  | 0.449097  |
| H    | 1.542735  | -1.523286 | -0.062155 |
| C    | -0.829581 | -0.182495 | 0.091930  |
| N    | -1.904478 | -0.640018 | -0.123799 |

**a-TS2A****Table 84** Cartesian coordinates in Å of the **a-TS2A** structure optimized at rev-DSDPBEP86-GD3BJ/jun-cc-pVTZ level of theory.

| Atom | X         | Y         | Z         |
|------|-----------|-----------|-----------|
| C    | -0.125935 | 0.526500  | -0.110469 |
| O    | -1.205310 | -0.147513 | 0.303887  |
| H    | -0.316904 | 1.547658  | -0.625836 |
| C    | 1.141653  | 0.163914  | 0.093029  |
| H    | 1.387740  | -0.832150 | 0.440043  |
| H    | 1.930984  | 0.863823  | -0.137811 |
| H    | -1.974381 | 0.099030  | -0.223160 |
| C    | -0.219055 | 3.054204  | -0.132064 |
| N    | 0.128120  | 3.731933  | 0.763958  |

**a-TS3A****Table 85** Cartesian coordinates in Å of the **a-TS3A** structure optimized at rev-DSDPBEP86-GD3BJ/jun-cc-pVTZ level of theory.

| Atom | X         | Y         | Z         |
|------|-----------|-----------|-----------|
| C    | 0.209844  | 0.452587  | -0.038680 |
| O    | -0.992465 | -0.091813 | 0.246408  |
| H    | 0.239994  | 1.523590  | -0.214966 |
| C    | 1.317373  | -0.286438 | -0.143926 |
| H    | 1.492310  | -1.303187 | 0.178921  |
| H    | 2.305615  | 0.361010  | -0.450970 |
| H    | -1.680272 | 0.575355  | 0.156657  |
| C    | 3.146720  | 1.391425  | 0.037578  |
| N    | 3.532066  | 2.298236  | 0.657416  |

**a-TS4A****Table 86** Cartesian coordinates in Å of the **a-TS4A** structure optimized at rev-DSDPBEP86-GD3BJ/jun-cc-pVTZ level of theory.

| Atom | X         | Y         | Z         |
|------|-----------|-----------|-----------|
| C    | 0.046295  | 0.326152  | 0.053876  |
| O    | -1.094324 | -0.375407 | -0.111901 |
| H    | -0.053940 | 1.382511  | 0.294616  |
| C    | 1.253619  | -0.211020 | -0.121272 |
| H    | 1.306860  | -1.356155 | -0.447955 |
| H    | 2.191418  | 0.250450  | 0.147217  |
| H    | -1.854055 | 0.206649  | -0.020874 |
| C    | 1.265516  | -2.733061 | 0.073106  |
| N    | 1.232151  | -3.663263 | 0.768092  |

**a-P1A****Table 87** Cartesian coordinates in Å of the **a-P1A** structure optimized at rev-DSDPBEP86-GD3BJ/jun-cc-pVTZ level of theory.

| Atom | X         | Y         | Z         |
|------|-----------|-----------|-----------|
| C    | -0.058371 | 0.399573  | 0.000009  |
| O    | -1.088306 | -0.248410 | 0.000001  |
| H    | -0.089641 | 1.504464  | 0.000040  |
| C    | 1.252370  | -0.198665 | -0.000015 |
| H    | 1.337980  | -1.276741 | -0.000042 |
| H    | 2.142688  | 0.415448  | -0.000007 |

**Table 88** Cartesian coordinates in Å of HCN structure optimized at rev-DSDPBEP86-GD3BJ/jun-cc-pVTZ level of theory.

| Atom | X         | Y        | Z         |
|------|-----------|----------|-----------|
| C    | -0.000000 | 0.000000 | -0.628545 |
| N    | -0.000000 | 0.000000 | 0.528914  |
| H    | -0.000000 | 0.000000 | -1.695936 |

**a-P2A****Table 89** Cartesian coordinates in Å of the **a-P2A** structure optimized at rev-DSDPBEP86-GD3BJ/jun-cc-pVTZ level of theory.

| Atom | X         | Y         | Z         |
|------|-----------|-----------|-----------|
| C    | 0.026173  | 0.349130  | -0.098557 |
| O    | -1.171265 | -0.215784 | -0.256321 |
| C    | 1.222768  | -0.184205 | 0.001602  |
| H    | 1.338199  | -1.257954 | 0.126447  |
| H    | 2.102483  | 0.441336  | -0.017486 |
| H    | -1.829030 | 0.280399  | 0.244292  |



**Table 90** Cartesian coordinates in Å of HCN structure optimized at rev-DSDPBEP86-GD3BJ/jun-cc-pVTZ level of theory.

| Atom | X         | Y        | Z         |
|------|-----------|----------|-----------|
| C    | -0.000000 | 0.000000 | -0.628545 |
| N    | -0.000000 | 0.000000 | 0.528914  |
| H    | -0.000000 | 0.000000 | -1.695936 |

**a-P3A**

**Table 91** Cartesian coordinates in Å of the **a-P3A** structure optimized at rev-DSDPBEP86-GD3BJ/jun-cc-pVTZ level of theory.

| Atom | X         | Y         | Z         |
|------|-----------|-----------|-----------|
| C    | -0.005398 | 0.375009  | 0.000011  |
| O    | -1.226214 | -0.262981 | 0.000008  |
| H    | -0.043998 | 1.461208  | 0.000038  |
| C    | 1.140067  | -0.249715 | -0.000017 |
| H    | 1.556621  | -1.240624 | -0.000045 |
| H    | -1.919299 | 0.402899  | 0.000025  |

**Table 92** Cartesian coordinates in Å of HCN structure optimized at rev-DSDPBEP86-GD3BJ/jun-cc-pVTZ level of theory.

| Atom | X         | Y        | Z         |
|------|-----------|----------|-----------|
| C    | -0.000000 | 0.000000 | -0.628545 |
| N    | -0.000000 | 0.000000 | 0.528914  |
| H    | -0.000000 | 0.000000 | -1.695936 |

**a-P4A**

**Table 93** Cartesian coordinates in Å of the **a-P4A** structure optimized at rev-DSDPBEP86-GD3BJ/jun-cc-pVTZ level of theory.

| Atom | X         | Y         | Z         |
|------|-----------|-----------|-----------|
| C    | 0.013981  | 0.437970  | 0.000012  |
| O    | -1.132688 | -0.309220 | 0.000003  |
| H    | -0.123402 | 1.520677  | 0.000040  |
| C    | 1.215637  | -0.071824 | -0.000012 |
| H    | 2.221555  | 0.305237  | -0.000011 |
| H    | -1.887354 | 0.284943  | 0.000024  |

**Table 94** Cartesian coordinates in Å of HCN structure optimized at rev-DSDPBEP86-GD3BJ/jun-cc-pVTZ level of theory.

| Atom | X         | Y        | Z         |
|------|-----------|----------|-----------|
| C    | -0.000000 | 0.000000 | -0.628545 |
| N    | -0.000000 | 0.000000 | 0.528914  |
| H    | -0.000000 | 0.000000 | -1.695936 |

## 4 Energy tables

### 4.1 Addition reactions

| <i>anti</i> -VyA + CN |        |            | <i>syn</i> -VyA + CN |        |            |
|-----------------------|--------|------------|----------------------|--------|------------|
| Species               | rDSD   | junChS-F12 | Species              | rDSD   | junChS-F12 |
| A+B                   | 0.0    | 0.0        | A+B                  | 0.0    | 0.0        |
| a-Int1                | -247.9 | -230.3     | s-Int1               | -242.9 | -225.9     |
| a-Int1b               | -117.7 | -115.1     | s-Int1b              | -117.7 | -109.6     |
| a-Int2                | -209.7 | -197.9     | s-Int2               | -209.7 | -192.6     |
| a-Int3                | -249.3 | -234.7     | s-Int3               | -246.4 | -231.3     |
| a-Int4                | -284.1 | -273.2     | s-Int4               | -284.1 | -267.9     |
| a-Int5                | -187.1 | -175.1     | s-Int5               | -187.1 | -169.8     |
| a-TS1                 | -112.7 | -114.1     | s-TS1                | -112.7 | -101.8     |
| a-TS1b                | -104.1 | -99.6      | s-TS1b               | -104.1 | -94.4      |
| a-TS3                 | -77.1  | -66.2      | s-TS3                | -77.1  | -60.9      |
| a-TS3b                | -92.0  | -92.4      | s-TS3b               | -92.0  | -87.1      |
| a-TS4                 | -91.4  | -77.2      | s-TS4                | -87.2  | -73.1      |
| a-TS5                 | -90.7  | -76.9      | s-TS5                | -84.5  | -71.1      |
| a-TS8                 | -85.5  | -73.4      | s-TS8                | -85.5  | -68.1      |
| a-TS10                | -73.3  | -63.8      | s-TS10               | -73.3  | -58.5      |
| a-TS12                | -63.2  | 52.9       | s-TS12               | -63.2  | -47.6      |
| a-TS13                | -96.3  | -81.4      | s-TS13               | -96.3  | -76.1      |
| a-TS14                | -96.4  | -82.6      | s-TS14               | -96.4  | -77.4      |
| a-TS15                | -121.3 | -106.9     | s-TS15               | -121.3 | -101.6     |
| a-TS16                | -58.4  | -51.9      | s-TS16               | -56.4  | -46.6      |
| a-P1                  | -115.5 | -98.6      | s-P1                 | -116.7 | -94.3      |
| a-P2                  | -100.4 | -85.1      | s-P2                 | -100.4 | -79.8      |
| a-P3                  | -134.6 | -114.9     | s-P3                 | -134.6 | -109.6     |
| a-P4                  | -140.1 | -119.5     | s-P4                 | -140.1 | -114.2     |
| a-P5                  | -131.6 | -116.0     | s-P5                 | -131.6 | -110.7     |
| a-P6                  | -112.0 | -101.5     | s-P6                 | -112.0 | -96.2      |
| a-P7                  | -126.0 | -109.4     | s-P7                 | -125.9 | -104.1     |

**Table 95** Anharmonic Zero-point Corrected Energies (in  $\text{kJ mol}^{-1}$ ) Relative to the Dissociation Limit for All the Species Involved in the *syn*-VyA + CN and *anti*-VyA + CN Addition Reactions Computed Using the Two Different Levels of Theory Discussed in Section 2.

## 4.2 Abstraction reactions

### 4.2.1 C attack

| <i>anti</i> -VyA + CN |        |            | <i>syn</i> -VyA + CN |        |            |
|-----------------------|--------|------------|----------------------|--------|------------|
| Species               | rDSD   | junChS-F12 | Species              | rDSD   | junChS-F12 |
| A+B                   | 0.0    | 0.0        | A+B                  | 0.0    | 0.0        |
| a-Int1A               | -247.9 | -230.3     | s-Int1A              | -242.9 | -225.9     |
| a-Int1bA              | -117.7 | -115.1     | s-Int1bA             | -117.7 | -109.6     |
| a-TS1A                | -42.4  | -23.2      | s-TS1A               | -64.7  | -44.2      |
| a-TS1bA               | -112.7 | -114.1     | s-TS1bA              | -112.7 | -101.8     |
| a-TS1cA               | -104.1 | -99.6      | s-TS1cA              | -104.1 | -94.4      |
| a-TS2A                | -6.3   | 10.6       | s-TS2A               | 5.0    | 21.0       |
| a-TS3A                | -6.5   | 6.9        | s-TS3A               | -5.3   | 8.5        |
| a-TS4A                | -4.9   | 7.7        | s-TS4A               | -16.9  | -3.2       |
| a-P1A                 | -192.2 | -177.9     | s-P1A                | -187.6 | -173.1     |
| a-P2A                 | -91.0  | -79.6      | s-P2A                | -86.4  | -74.8      |
| a-P3A                 | -61.6  | -58.2      | s-P3A                | -57.0  | -53.4      |
| a-P4A                 | -63.5  | -63.8      | s-P4A                | -58.9  | -59.0      |

**Table 96** Anharmonic Zero-point Corrected Energies (in  $\text{kJ mol}^{-1}$ ) Relative to the Dissociation Limit for All the Species Involved in the *syn*-VyA + CN and *anti*-VyA + CN Abstraction Reactions Computed Using the Two Different Levels of Theory Discussed in Section 2.

## 5 MESS input files

### 5.1 Syn-VyA + CN

```
*****
!
! GLOBAL SECTION
*****
!!!!!!!!!!!!!!!!!!!!!!!!!!!!!!!!!!!!!!!!!!!!!!!!!!!!!!!!!!!!

TemperatureList [K]          30 40 50 60 70 80 90 100 110 120
                             130 140 150 160 170 180 190 200
                             210 220 230 240 250 260 270 280
                             290 300 310 320 330 340 350 360
                             370 380 390 400 410 420 430 440
                             450 460 470 480 490 500 510 520
                             530 540 550 560 570 580 590 600

PressureList [atm]          1.e-8 1
EnergyStepOverTemperature   .2
ExcessEnergyOverTemperature 30
ModelEnergyLimit [kcal/mol] 400
CalculationMethod           low-eigenvalue
WellCutoff                  20
ChemicalEigenvalueMax       0.2
ReductionMethod             projection
AtomDistanceMin [bohr]      1.3
RateOutput                  rate.out
```

```
!!!!!!!!!!!!!!!!!!!!!!!!!!!!!!!!!!!!!!!!!!!!!!!!!!!!!!!!!!!!
*****
!
! MODEL SECTION
*****
!!!!!!!!!!!!!!!!!!!!!!!!!!!!!!!!!!!!!!!!!!!!!!!!!!!!!!!!!!!!
```

```
Model

  EnergyRelaxation
    Exponential
      Factor [1/cm]          260
      Power                  0.85
      ExponentCutoff         15
End

CollisionFrequency
  LennardJones
    Epsilons [K]             127.697 1280.940
    Sigmas [angstrom]        3.462 4.495
    Masses [amu]             39.948 70.07098
End
```

```
*****
!
*****
!!!!!!!!!!!!!!!!!!!!!!!!!!!!!!!!!!!!!!!!!!!!!!!!!!!!!!!!!!!!
*****
! REACTANT syn-Vy + CN
```

!\*\*\*\*\*

Bimolecular REACS

Fragment C2H4O

RRHO

Geometry[angstrom] 7  
C -0.036309 0.442827 0.000002  
O 1.206308 -0.115176 -0.000002  
H 0.027835 1.523455 -0.000001  
C -1.199885 -0.207586 0.000001  
H -1.253910 -1.290335 -0.000002  
H -2.123655 0.351690 -0.000006  
H 1.116437 -1.074853 0.000005

Core RigidRotor

SymmetryFactor 1.0000000000000000

End

Frequencies[1/cm] 15

447.1190 488.0154 716.3502  
829.9799 962.9976 999.9229  
1123.4916 1331.1630 1356.5408  
1456.4521 1702.4021 3163.9015  
3216.3548 3269.8330 3817.0327

ZeroEnergy[kJ/mol] 0.

ElectronicLevels[1/cm] 1

0 1

!\*\*\*\*\*

End

!\*\*\*\*\*

Fragment CN

RRHO

Geometry[angstrom] 2  
C -1.875383 0.453789 0.017829  
N -0.716421 0.453789 0.017829

Core RigidRotor

SymmetryFactor 1.0000000000000000

End

Frequencies[1/cm] 1

2411.1619

ZeroEnergy[kJ/mol] 0.

ElectronicLevels[1/cm] 1

0 2

!\*\*\*\*\*

End

!\*\*\*\*\*

GroundEnergy[kJ/mol] 0.0

End

!\*\*\*\*\*

! PRODUCT P1

!\*\*\*\*\*

Bimolecular P1

Fragment C3H3NO

RRHO

Geometry[angstrom] 8  
C -0.928205 -0.382036 0.000000  
H -0.737944 -1.447545 0.000000  
C 0.066381 0.520301 0.000000  
H -0.130291 1.586302 0.000000  
O -2.245078 -0.107506 0.000000

```

H    -2.383240    0.847574    -0.000000
C     1.427541    0.100522     0.000000
N     2.545400   -0.222715    -0.000000
Core RigidRotor
SymmetryFactor  1.0000000000000000
End
  Frequencies[1/cm]   18
177.8672 191.9231 446.1290
480.9153 525.8791 554.5641
807.4403 995.6009 1033.3436
1155.9231 1269.5349 1341.9119
1398.5694 1702.1272 2262.1464
3192.1499 3227.9142 3803.9608
ZeroEnergy[kJ/mol]          0.
ElectronicLevels[1/cm]          1
  0.0000000000000000    1.0000000000000000
  !*****
End
!*****
Fragment HYDROGEN
Atom
Name H
ElectronicLevels[1/cm]    1
  0    2
  !*****
End
!*****
GroundEnergy[kJ/mol] -94.30
End
!*****
! PRODUCT P2
!*****
Bimolecular P2
Fragment C3H3NO
RRHO
Geometry[angstrom]      8
C    0.443981    0.039262    -0.000001
C    1.198529    1.140439     0.000000
H    2.276862    1.062360     0.000002
O    0.990152   -1.212171    -0.000000
H    0.291376   -1.874294     0.000005
C   -0.994930    0.104485    -0.000001
N   -2.157744    0.098859     0.000001
H    0.729281    2.112173     0.000000
Core RigidRotor
SymmetryFactor  1.0000000000000000
End
  Frequencies[1/cm]   18
193.3575 232.2772 291.3889
422.2905 608.0666 637.7575
739.3691 797.2002 886.2303
985.2469 1240.7954 1342.9461
1440.1943 1714.9378 2258.4905
3190.6084 3296.5683 3843.1869
ZeroEnergy[kJ/mol]          0.
ElectronicLevels[1/cm]          1
  0.0000000000000000    1.0000000000000000

```

```

!*****
End
!*****
Fragment HYDROGEN
Atom
Name H
ElectronicLevels[1/cm]      1
0      2
!*****
End
!*****
GroundEnergy[kJ/mol] -79.80
End
!*****
! PRODUCT P3
!*****
Bimolecular P3
Fragment C3H3NO
RRHO
Geometry[angstrom]          8
C   -1.345923   0.104809   -0.027948
N   -2.377393  -0.417343   -0.125136
C   -0.023598   0.714489    0.099916
H    0.191721   1.363573   -0.749015
H   -0.003508   1.324207    1.009576
C    1.076489  -0.337387    0.222890
O    2.175451  -0.176213   -0.242639
H    0.808118  -1.248133    0.787358
Core RigidRotor
SymmetryFactor  1.0000000000000000
End
  Frequencies[1/cm]    18
61.1798 181.1152 351.3555
469.1521 521.0854 737.8674
964.6614 1046.0583 1050.0161
1227.9169 1297.3395 1419.0734
1451.8066 1794.2927 2284.8892
2973.3366 3061.7878 3137.0962
ZeroEnergy[kJ/mol]      0.
ElectronicLevels[1/cm]      1
0.0000000000000000      1.0000000000000000
!*****
End
!*****
Fragment HYDROGEN
Atom
Name H
ElectronicLevels[1/cm]      1
0      2
!*****
End
!*****
GroundEnergy[kJ/mol] -109.60
End
!*****
! PRODUCT P4
!*****

```



```

Bimolecular P4
Fragment C3H3NO
RRHO
Geometry[angstrom]          8
C      0.435388      0.206437      -0.000013
O      0.875395      1.331535      -0.000061
C     -1.033749     -0.009358      0.000014
N     -2.179015     -0.205280      0.000032
C      1.253779     -1.050580      0.000026
H      1.002871     -1.648213      0.879919
H      1.002857     -1.648277     -0.879819
H      2.311705     -0.797822      0.000008
Core RigidRotor
SymmetryFactor      1.0000000000000000
End
  Frequencies[1/cm]      18
  136.5165 177.0018 250.3718
  433.1108 589.6386 595.9424
  724.1801 993.0990 1050.8204
  1209.4700 1405.3542 1472.7222
  1480.6838 1770.4367 2246.8223
  3053.6406 3124.0572 3176.6486
ZeroEnergy[kJ/mol]          0.
ElectronicLevels[1/cm]          1
  0.0000000000000000      1.0000000000000000
  !*****
End
!*****
Fragment HYDROGEN
Atom
Name H
ElectronicLevels[1/cm]          1
  0      2
  !*****
End
!*****
GroundEnergy[kJ/mol] -114.20
End
!*****
! PRODUCT P5
!*****
Bimolecular P5
Fragment C2HNO
RRHO
Geometry[angstrom]          5
C     -0.692079      0.426205      -0.000021
O     -1.562173     -0.407499      0.000045
C      0.737630      0.069129     -0.000014
N      1.873815     -0.174115     -0.000009
H     -0.892626      1.506792     -0.000090
Core RigidRotor
SymmetryFactor      1.0000000000000000
End
  Frequencies[1/cm]      9
  224.6826 297.9226 616.1239
  927.4680 998.9194 1413.0009
  1751.8461 2250.0589 3033.9889

```

```

ZeroEnergy[kJ/mol]          0.
ElectronicLevels[1/cm]      1
0.0000000000000000        1.0000000000000000
!*****
End
!*****
Fragment CH3
RRHO
Geometry[angstrom]         4
C   -0.204697   0.140730   -0.218631
H    0.303637   -0.757915    0.092664
H    0.303657   0.859632   -0.841227
H   -1.221388   0.320469    0.092664
Core RigidRotor
SymmetryFactor   1.0000000000000000
End
Frequencies[1/cm]    6
488.3360 1430.3272 1430.3273
3136.9147 3319.3943 3319.3943
ZeroEnergy[kJ/mol]          0.
ElectronicLevels[1/cm]      1
0      2
!*****
End
!*****
GroundEnergy[kJ/mol] -110.70
End
!*****
! PRODUCT P6
!*****
Bimolecular P6
Fragment C3H3N
RRHO
Geometry[angstrom]         7
C   -0.608242   0.671357   0.000006
H   -1.181236  -0.247803   0.000007
C    0.727830   0.662097   0.000002
H    1.269248  -0.274564   0.000000
H    1.298781   1.581579   0.000001
C   -1.365754   1.888472   0.000009
N   -1.997712   2.864467   0.000012
Core RigidRotor
SymmetryFactor   1.0000000000000000
End
Frequencies[1/cm]    15
230.6762 340.8485 566.7814
702.0030 880.3037 987.8886
1010.4583 1111.1755 1322.6420
1453.7345 1675.5742 2263.3312
3172.0516 3204.5565 3270.4973
ZeroEnergy[kJ/mol]          0.
ElectronicLevels[1/cm]      1
0.0000000000000000        1.0000000000000000
!*****
End
!*****
Fragment HO

```

```

RRHO
Geometry[angstrom]      2
O   -1.121951    0.449697   -0.040988
H   -1.446314    1.365670   -0.040988
Core RigidRotor
SymmetryFactor    1.0000000000000000
End
  Frequencies[1/cm]    1
3757.1215
ZeroEnergy[kJ/mol]      0.
ElectronicLevels[1/cm]  1
  0      2
  !*****
End
!*****
GroundEnergy[kJ/mol] -96.20
End
!*****
! PRODUCT P7
!*****
Bimolecular P7
Fragment C3H3NO
RRHO
Geometry[angstrom]      8
C   1.186962    0.447476   -0.000000
C   -0.062691    0.933629    0.000000
O   1.443243   -0.876551    0.000001
H   2.392715   -1.026824   -0.000003
H   -0.208611    2.003819    0.000000
C   -1.216174    0.096418    0.000000
N   -2.173932   -0.564025   -0.000000
H   2.038897    1.118445   -0.000000
Core RigidRotor
SymmetryFactor    1.0000000000000000
End
  Frequencies[1/cm]    18
149.3755 270.1390 371.8154
405.5380 590.2572 728.6013
744.5695 949.8776 952.8482
1118.2506 1256.9964 1305.2108
1437.4753 1726.3904 2260.3805
3191.4026 3239.6076 3862.2591
ZeroEnergy[kJ/mol]      0.
ElectronicLevels[1/cm]  1
  0.0000000000000000    1.0000000000000000
  !*****
End
!*****
Fragment HYDROGEN
Atom
Name H
ElectronicLevels[1/cm]  1
  0      2
  !*****
End
!*****
GroundEnergy[kJ/mol] -104.1

```

```

End
!*****
! INT1
!*****
Well INT1
Species
RRHO      ! well
Geometry[angstrom]          9
C   -1.223970   0.346877   0.284567
O   -1.480884  -0.913455  -0.162057
H   -2.121561   0.940412   0.387136
C    0.040897   1.030829  -0.153977
H    0.211418   1.921086   0.454209
H   -0.010268   1.353709  -1.203771
H   -0.655988  -1.414046  -0.216449
C    1.190800   0.128598  -0.026067
N    2.045701  -0.651991   0.057004
Core RigidRotor
SymmetryFactor  1.0000000000000000
End
      Frequencies[1/cm]          21
104.8434 195.4863 359.0316
396.3923 430.4077 571.8361
704.2136 878.3949 930.9778
1008.3447 1190.8113 1219.3940
1318.5625 1356.7911 1438.6752
1464.7128 2280.3431 2997.9781
3110.1984 3224.7627 3776.2105
ZeroEnergy[kJ/mol]      -225.90
ElectronicLevels[1/cm]          1
      0.0000000000000000      2.0000000000000000
End
End
!*****
! INT1b
!*****
Well INT1b
Species
RRHO      ! well
Geometry[angstrom]          9
C    0.608031   0.077743   0.482179
O    1.603376  -0.532773  -0.264103
H    0.753870   0.115309   1.558569
C   -0.101622   1.228876  -0.170371
H    0.174886   1.443105  -1.195982
H   -0.398541   2.070548   0.443327
H    1.599009  -1.476259  -0.070555
C   -0.848535  -0.058934   0.027189
N   -1.819387  -0.773261  -0.085589
Core RigidRotor
SymmetryFactor  1.0000000000000000
End
      Frequencies[1/cm]          21
192.9948 303.4593 341.8400
407.9965 480.9881 632.8981
744.7721 853.2036 947.4843
1046.2638 1060.5682 1126.4775

```

```

1202.6147 1291.1035 1403.3887
1450.6253 1912.9150 3140.8455
3143.1163 3245.5710 3827.3056
ZeroEnergy[kJ/mol]      -109.60
ElectronicLevels[1/cm]          1
  0.0000000000000000      2.0000000000000000
End
End
!*****
! INT2
!*****
Well INT2
Species
RRHO      ! well
Geometry[angstrom]          9
C      0.424723  -0.018446   0.383703
O      1.006460  -1.208950  -0.140369
H      0.560788  -0.108137   1.466272
C      1.086852   1.217589  -0.126004
H      2.154941   1.311218   0.005584
H      0.522218   2.012839  -0.587756
H      0.992787  -1.145271  -1.102593
C     -1.033056   0.018850   0.124049
N     -2.170629   0.053585  -0.102315
Core RigidRotor
SymmetryFactor  1.0000000000000000
End
  Frequencies[1/cm]          21
65.8557 190.8567 232.0591
334.9546 393.3755 509.3741
574.5730 613.0193 807.2125
976.1030 1089.5257 1125.7179
1237.7492 1346.9905 1413.0694
1469.2960 2274.6364 3057.1023
3184.8072 3308.6257 3809.8375
ZeroEnergy[kJ/mol]      -192.60
ElectronicLevels[1/cm]          1
  0.0000000000000000      2.0000000000000000
End
End
!*****
! INT3
!*****
Well INT3
Species
RRHO      ! well
Geometry[angstrom]          9
C      0.988855  -0.451602   0.291772
O      2.181772   0.091644  -0.250676
H      0.700065  -1.384477  -0.203082
C     -0.141240   0.528383   0.246121
H      0.057252   1.572710   0.446049
H      2.046477   0.238001  -1.192277
C     -1.461617   0.120365   0.020576
N     -2.547823  -0.241163  -0.175942
H      1.225660  -0.692625   1.332968
Core RigidRotor

```

```

SymmetryFactor    1.0000000000000000
End
  Frequencies[1/cm]          21
47.0339 185.5126 325.0330
394.7722 428.4037544.6996
577.9890 887.5487 1041.8618
1071.4663 1120.2467 1195.5659
1320.2677 1398.8290 1428.7017
1498.8184 2316.6123 3036.8405
3078.0715 3225.4018 3834.6120
ZeroEnergy[kJ/mol]      -231.30
ElectronicLevels[1/cm]          1
  0.0000000000000000      2.0000000000000000
End
End
!*****
!  INT4
!*****
Well INT4
Species
RRHO      ! well
Geometry[angstrom]          9
C      0.338179      0.053219      0.000062
O      0.862528      1.306811      0.000292
C      1.325205     -1.052983      0.000045
H      1.968304     -0.991214      0.883150
H      0.816834     -2.015413     -0.000143
H      0.152117      1.959414      0.000287
C     -1.050149     -0.116959     -0.000144
N     -2.208459     -0.235861     -0.000314
H      1.968528     -0.990987     -0.882881
Core RigidRotor
SymmetryFactor    1.0000000000000000
End
  Frequencies[1/cm]          21
90.6477 190.0395 238.3457
385.8546 404.4841 461.3178
621.5631 749.7738 1015.0283
1023.8833 1172.6828 1366.3166
1411.4686 1441.0116 1478.6647
1511.7408 2329.9872 3034.6289
3090.0035 3159.0180 3814.6683
ZeroEnergy[kJ/mol]      -267.90
ElectronicLevels[1/cm]          1
  0.0000000000000000      2.0000000000000000
End
End
!*****
!  INT5
!*****
Well INT5
Species
RRHO      ! well
Geometry[angstrom]          9
C      0.409848     -0.041316      0.380390
O      1.041703     -1.144416     -0.140658
C      1.125194      1.214977     -0.154543

```

```

H      1.065265      1.238867      -1.241852
H      0.635570      2.101157      0.248889
C     -1.038927      0.003264      0.057753
N     -2.171740      0.059832     -0.186926
H      2.168228      1.191981      0.156014
H      0.521602     -0.063452      1.472807
Core RigidRotor
SymmetryFactor      1.0000000000000000
End
      Frequencies[1/cm]          21
185.9006 214.4629 245.7042
293.8295 505.1179 579.8116
800.6449 894.3748 985.6645
1041.5556 1122.4717 1232.4704
1350.7839 1406.0258 1493.4699
1510.1447 2273.0772 3017.1289
3071.1608 3161.0452 3171.1542
ZeroEnergy[kJ/mol]      -169.80
ElectronicLevels[1/cm]          1
      0.0000000000000000      2.0000000000000000
End
End
!*****
! BARRIERLESS ENTRANCE CHANNEL - PHASE SPACE THEORY
!*****
Barrier B0 REACS INT1
RRHO
      Stoichiometry C3H4N1O1
      Core PhaseSpaceTheory
      FragmentGeometry[angstrom]          7
C     -0.036309      0.442827      0.000002
O      1.206308     -0.115176     -0.000002
H      0.027835      1.523455     -0.000001
C     -1.199885     -0.207586      0.000001
H     -1.253910     -1.290335     -0.000002
H     -2.123655      0.351690     -0.000006
H      1.116437     -1.074853      0.000005
      FragmentGeometry[angstrom]          2
C     -1.875383      0.453789      0.017829
N     -0.716421      0.453789      0.017829
SymmetryFactor      1.0000000000000000
      PotentialPrefactor[au]          64.087
      PotentialPowerExponent 6
      End
      Frequencies[1/cm]          16
447.1190 488.0154 716.3502
829.9799 962.9976 999.9229
1123.4916 1331.1630 1356.5408
1456.4521 1702.4021 3163.9015
3216.3548 3269.8330 3817.0327
2411.1619
ZeroEnergy[kJ/mol]      0.
ElectronicLevels[1/cm]          1
      0.0000000000000000      2.0000000000000000
      End
!*****
Barrier TS1 INT1 INT1b

```

```

RRHO
  Geometry [angstrom]          9
C    0.667077    0.096591    0.485498
O    1.634643   -0.636635   -0.148131
H    0.807100    0.126835    1.556499
C   -0.094898    1.197815   -0.185872
H    0.167373    1.426518   -1.215603
H   -0.355272    2.063858    0.415481
H    1.427359   -0.716241   -1.085950
C   -0.934516   -0.001828   -0.000229
N   -1.827872   -0.791445   -0.050937
Core RigidRotor
  SymmetryFactor    1
End
Rotor Hindered
Group 7
Axis 1 2
Potential [kJ/mol] 24
0.0
0.384531131041655
1.47030644085475
2.89502436536483
4.31435212655795
5.6060688479987
6.79707940421117
7.8849866795811
8.74069374275182
9.06711207726815
8.43506397539111
6.49114222014795
3.19850930340067
-0.960534345751633
-5.07495242028298
-8.14490401874958
-9.42151925209061
-8.6796217644428
-6.31733649378974
-3.27931161061933
-0.698192063120729
0.661604741482321
0.780898464158717
0.297642969226459
End
Tunneling   Eckart
  ImaginaryFrequency [1/cm] 577.5630
  WellDepth [kJ/mol]    124.10
  WellDepth [kJ/mol]    7.80
End
  Frequencies [1/cm] 20
138.0329 249.1384 337.9022
415.4476 478.4118 783.9889
849.4804 941.7737 1007.2288
1077.2953 1117.7864 1207.2879
1324.7120 1423.5397 1453.1612
2030.3371 3108.0357 3199.1384
3229.6599 3820.9414
  ZeroEnergy [kJ/mol]    -101.80

```



```

ElectronicLevels[1/cm]
  0      2
End
!*****
Barrier TS1b INT1b INT2
RRHO
  Geometry[angstrom]      9
C   0.567096   0.035035   0.461466
O   1.512286  -0.722091  -0.229405
H   0.712619   0.082565   1.540513
C   0.009785   1.273776  -0.165612
H   0.165385   1.425643  -1.224305
H  -0.316229   2.095358   0.455608
H   2.297633  -0.175153  -0.345094
C  -0.830667  -0.191724   0.084663
N  -1.919283  -0.622029  -0.124941
  Core RigidRotor
  SymmetryFactor  1
End
Rotor Hindered
Group 7
Axis 1 2
Potential[kJ/mol] 24
0.0
0.489270730274633
1.89197199562412
3.70901043041916
5.04851037719963
5.00146143429436
3.18676419744718
0.033827921400906
-3.41981157783085
-6.04393324540262
-7.09080733819441
-6.46648009661861
-4.74323869406182
-2.8628469386589
-1.66592431936764
-1.39529596020829
-1.59447630297682
-1.55602531634445
-0.874531418291028
0.290695245081544
1.33462459496117
1.65246256235773
1.16385733293389
0.37928981933274
End
Tunneling Eckart
  ImaginaryFrequency[1/cm] 677.9480
  WellDepth[kJ/mol]      15.20
  WellDepth[kJ/mol]      98.20
End
  Frequencies[1/cm] 20
211.4278 226.3736 351.7120
406.1711 492.1999 745.8929
824.8348 873.6945 894.5697

```

```

1080.2098 1167.7307 1205.7098
1306.4266 1393.4610 1449.8594
2042.6957 3107.2677 3170.6329
3294.3832 3813.4662
  ZeroEnergy[kJ/mol]          -94.40
  ElectronicLevels[1/cm]      1
    0      2
End
!*****
Barrier TS3 INT1 INT3
RRHO
  Geometry[angstrom]         9
C   1.250669   0.421444   -0.080454
O   1.448643  -0.922534   -0.134443
H   2.114504   1.008116   0.195654
C  -0.102803   0.996542   0.152658
H   0.500170   1.057870  -0.988633
H  -0.181906   1.956790   0.641123
H   0.610965  -1.384199   0.013819
C  -1.210093   0.115617   0.129903
N  -2.059686  -0.679345   0.077561
Core MultiRotor
  SymmetryFactor 1.0
  InterpolationEnergyMax[kJ/mol] 1000
  PotentialEnergySurface[kJ/mol] ./TS3.dat
  InternalRotation
Group 7
Axis 1 2
Symmetry 1
  MassExpansionSize 3
  GridSize 100
End
  InternalRotation
Group 7 9
Axis 4 1
Symmetry 1
  MassExpansionSize 3
  GridSize 100
End
End
Tunneling Eckart
  ImaginaryFrequency[1/cm] 1924.2687
  WellDepth[kJ/mol] 165.00
  WellDepth[kJ/mol] 170.40
End
  Frequencies[1/cm] 20
130.8542 206.6971 331.0802
412.6942 432.8810 657.4672
683.1535 813.3618 895.1560
1076.6411 1193.8244 1273.1801
1327.2376 1359.2747 1433.7286
2145.0885 2327.6981 3224.0019
3234.3662 3749.8659
  ZeroEnergy[kJ/mol]          -60.90
  ElectronicLevels[1/cm]      1
    0      2
End

```

```

!*****
Barrier TS3b INT2 P6
RRHO
  Geometry[angstrom]          9
C   0.255727   0.377936   0.511840
O   1.217745  -1.312316  -0.036073
H   0.515450   0.158045   1.537357
C   1.023432   1.184436  -0.249777
H   0.702847   1.496782  -1.234800
H   1.999153   1.490612   0.098749
H   1.018149  -1.323017  -0.985933
C  -1.099169   0.063911   0.121422
N  -2.190669  -0.166943  -0.188721
Core MultiRotor
  SymmetryFactor  1.0
  InterpolationEnergyMax[kJ/mol]  1000
  PotentialEnergySurface[kJ/mol]  ./TS3b.dat
  InternalRotation
Group  7
Axis  1 2
Symmetry          1
  MassExpansionSize 3
  GridSize          100
End
  InternalRotation
Group  6 8
Axis  4 1
Symmetry          1
  MassExpansionSize 3
  GridSize          100
End
End
Tunneling  Eckart
  ImaginaryFrequency[1/cm] 552.4366
  WellDepth[kJ/mol]      105.5
  WellDepth[kJ/mol]      9.10
End
  Frequencies[1/cm] 20
144.9891 171.3810 223.1567
281.2298 429.4659 567.6507
670.0482 796.9721 875.3571
974.7342 1047.7554 1114.9621
1310.1136 1454.4357 1640.7606
2416.6629 3180.9562 3233.0109
3288.9018 3757.0446
  ZeroEnergy[kJ/mol]      -87.10
  ElectronicLevels[1/cm]          1
    0      2
End
!*****
Barrier TS4 INT1 P1
RRHO
  Geometry[angstrom]          9
C   0.928335  -0.404711   0.085427
O   2.237659  -0.159495  -0.041233
H   0.729286  -1.408639   0.435211
C  -0.058345   0.500858  -0.104044

```

|   |           |           |           |
|---|-----------|-----------|-----------|
| H | 0.137177  | 1.445670  | -0.597098 |
| H | -0.106689 | 1.512462  | 1.426851  |
| H | 2.381454  | 0.753701  | -0.319982 |
| C | -1.424697 | 0.063416  | -0.055659 |
| N | -2.530609 | -0.283516 | -0.024209 |

Core RigidRotor

SymmetryFactor 1

End

Rotor Hindered

Group 7 9

Axis 4 1

Potential[kJ/mol] 72

0.0

0.518435320026356

2.06352484000831

4.6121504000098

8.13536515997271

12.5931525200315

17.9392241599771

24.1142751200016

31.047992559968

38.6559526600081

46.8382662799627

55.476098339966

64.4288598199921

73.5282485599896

82.5759056200297

91.3229977399794

99.472962940024

106.689023219991

112.695374480001

117.413839399967

120.96278791999

123.513834080035

125.190036139998

125.934225040021

81.4466783000114

70.1744464199805

59.630450620034

49.8218567600304

37.7298880400019

28.2866662000288

19.8321175000046

12.4161629800142

6.08539879999626

0.88194210002257

-3.16189068001336

-6.03110716002107

-7.72900075999132

-8.27981336003631

-7.73012162000555

-6.13767673998495

-3.57309264001628

-0.111360859972365

4.17178059999515

9.20187501998839

14.9053330399966

21.2101029400344  
 28.0424302599897  
 35.3301322399773  
 42.9965533399866  
 50.9639909999805  
 59.1537785800085  
 67.4818991599636  
 75.8580973799894  
 84.186578059979  
 92.3473623800135  
 100.171810959972  
 107.417443899971  
 113.735865100034  
 118.668425980007  
 90.0420476800207  
 77.0374287800337  
 64.8521146000178  
 53.615015999975  
 43.3963670400033  
 34.2374523400224  
 26.1589907800101  
 19.1720882600123  
 13.2780133200185  
 8.47349255998893  
 4.75104942002531  
 2.10397225998804  
 0.523650660028352

End

Tunneling Eckart

ImaginaryFrequency[1/cm] 1132.7066  
 WellDepth[kJ/mol] 152.80  
 WellDepth[kJ/mol] 131.60

End

Frequencies[1/cm] 20

176.8495 188.6152 337.7839  
 431.0837 454.5263 539.0130  
 552.3565 561.9078 928.1928  
 1004.5821 1027.6907 1163.2941  
 1277.9197 1339.1607 1399.4421  
 1675.3413 2377.5330 3193.1680  
 3237.5317 3797.8634

ZeroEnergy[kJ/mol] -73.10

ElectronicLevels[1/cm] 1

0 2

End

!\*\*\*\*\*

Barrier TS5 INT3 P7

RRHO

Geometry[angstrom] 9

|   |           |           |           |
|---|-----------|-----------|-----------|
| C | -0.911418 | -0.314912 | -0.087016 |
| O | -2.187371 | 0.126116  | -0.081448 |
| H | -0.811696 | -1.154395 | 1.549218  |
| C | 0.104414  | 0.552000  | 0.111747  |
| H | -0.085893 | 1.574247  | 0.408131  |
| H | -2.789749 | -0.616243 | -0.187521 |
| C | 1.452092  | 0.102200  | 0.004034  |
| N | 2.550544  | -0.258025 | -0.080419 |

```

H      -0.725060   -1.309320   -0.478730
Core RigidRotor
  SymmetryFactor  1
End
Rotor Hindered
Group 6 8
Axis 1 4
Potential[kJ/mol] 24
0.0
4.88679733997964
19.8201027365685
44.4155281349784
76.3147442537587
91.9794744907802
91.2265299511137
69.5404394183666
43.4284832272013
20.3078324451242
2.59075316491224
-7.86425219257063
-9.7514228684782
-2.54609923753298
13.5250010601904
37.4939882534694
67.672350897104
101.810903165664
88.117441388147
76.0142883291344
57.1061701399517
35.8955218331025
17.2453034784595
4.56195809335238
End
Tunneling  Eckart
  ImaginaryFrequency[1/cm] 1172.0875
  WellDepth[kJ/mol]      159.70
  WellDepth[kJ/mol]      17.00
  End
  Frequencies[1/cm] 20
174.2402 176.1744 357.3691
430.5634 482.3635 496.3392
533.9950 574.1246 832.2724
1026.5000 1063.9784 1183.7277
1222.6019 1345.4755 1362.1333
1674.7178 2432.7337 3185.7154
3229.2160 3853.7192
  ZeroEnergy[kJ/mol]      -71.1
  ElectronicLevels[1/cm]      1
    0      2
End
!*****
Barrier TS8 INT1 P3
RRHO
  Geometry[angstrom]      9
C      0.973209   -0.456428   -0.014424
O      2.161746   -0.170047   -0.093295
H      0.648941   -1.485026    0.189502

```

```

C   -0.072654    0.631607   -0.071866
H    0.065333    1.226198   -0.977742
H    0.124238    1.302403    0.776609
H    2.684898    0.765786    0.910022
C   -1.439801    0.121175   -0.002176
N   -2.511700   -0.318159    0.054110

Core MultiRotor
SymmetryFactor 1.0
InterpolationEnergyMax[kJ/mol] 1000
PotentialEnergySurface[kJ/mol] ./TS8.dat
InternalRotation
Group 3 7
Axis 1 2
Symmetry 1
MassExpansionSize 5
GridSize 100
End
InternalRotation
Group 2 8
Axis 1 4
Symmetry 1
MassExpansionSize 5
GridSize 100
End
End
Tunneling Eckart
ImaginaryFrequency[1/cm] 2023.5248
WellDepth[kJ/mol] 157.80
WellDepth[kJ/mol] 41.50
End
Frequencies[1/cm] 18
214.2732
350.1666 451.1130 530.6838
658.9097 735.1715 973.2821
1027.8267 1059.2225 1224.4017
1302.6205 1400.1727 1440.4622
1746.6984 2290.6437 3020.9551
3047.5858 3105.0041
ZeroEnergy[kJ/mol] -68.10
ElectronicLevels[1/cm] 1
0 2
End
!*****
Barrier TS10 INT2 INT4
RRHO
Geometry[angstrom] 9
C 0.302171 -0.068947 0.490469
O 0.997951 -1.130198 -0.185764
H 0.385532 -0.151275 1.574392
C 1.221740 0.927431 -0.157514
H 0.828727 1.513614 -0.979728
H 1.998643 1.360990 0.460350
H 1.704876 -0.199318 -0.678716
C -1.111398 0.022089 0.103609
N -2.229604 0.112745 -0.193324
Core RigidRotor
SymmetryFactor 1

```

```

End
Rotor Hindered
Group 5 6 9
Axis 1 4
Potential[kJ/mol] 18
0.0
1.56583272520122
-3.05198596261307
-4.10440274574545
3.32886687977174
15.3285021308439
17.6038989771894
7.54679094859423
-6.44584221874153
27.2715115269646
-6.42704752899065
6.89025819012119
15.4059708955886
12.1507874326697
1.13522766911968
-7.4575030457187
-8.35931501190985
0.753203914369287
End
Tunneling      Eckart
  ImaginaryFrequency[1/cm] 2114.0032
  WellDepth[kJ/mol]      134.10
  WellDepth[kJ/mol]      209.40
  End
  Frequencies[1/cm] 20
196.9441 221.9988 381.7461
528.6942 557.9973 722.2595
838.4083 962.9805 1010.9513
1073.0214 1109.6784 1154.9159
1258.1904 1382.2607 1437.4478
1997.5196 2278.2297 3108.6690
3144.5096 3265.0793
  ZeroEnergy[kJ/mol]      -58.50
  ElectronicLevels[1/cm]      1
    0      2
End
!*****
Barrier TS12 INT2 INT5
RRHO
  Geometry [angstrom]      9
C    0.334038   -0.054029    0.133156
O    0.929903   -1.280255   -0.049322
H    0.732929    0.651726    1.118530
C    1.132907    1.179164   -0.041148
H    0.638686    2.112256   -0.261441
H    2.206066    1.076333   -0.087525
H    1.472745   -1.238061   -0.848368
C    -1.091167    0.006170    0.023773
N    -2.249515    0.075763   -0.029666
Core MultiRotor
  SymmetryFactor 1.0
  InterpolationEnergyMax[kJ/mol] 1000

```



```

PotentialEnergySurface[kJ/mol] ./TS12.dat
InternalRotation
Group 7 9
Axis 1 2
Symmetry          1
  MassExpansionSize 3
  GridSize        100
End
  InternalRotation
Group 8 5
Axis 4 1
Symmetry          1
  MassExpansionSize 3
  GridSize        100
End
End
Tunneling      Eckart
  ImaginaryFrequency[1/cm] 1972.0316
  WellDepth[kJ/mol]      145.00
  WellDepth[kJ/mol]      122.20
End
  Frequencies[1/cm] 20
189.8434 242.4808 291.1496
391.0150 422.7216 559.6722
595.3947 669.3678 763.0413
961.0849 1176.9525 1286.1121
1308.6600 1390.4744 1433.0032
2230.9042 2360.3820 3188.9666
3320.1960 3747.1329
  ZeroEnergy[kJ/mol]      -47.60
  ElectronicLevels[1/cm]
    0      2
End
*****
Barrier TS13 INT4 P4
RRHO
  Geometry[angstrom]      9
C    0.404534    0.110560    0.080546
O    0.933802    1.210862    0.154848
C    1.145341   -1.181204   -0.032381
H    2.198169   -1.021530    0.189752
H    0.716415   -1.928851    0.637712
H    1.425798    1.899735   -1.094031
C   -1.063633    0.018064    0.003480
N   -2.214645   -0.085852   -0.057717
H    1.036995   -1.560560   -1.054883
Core RigidRotor
  SymmetryFactor  1
End
Tunneling      Eckart
  ImaginaryFrequency[1/cm] 1939.2933
  WellDepth[kJ/mol]      38.10
  WellDepth[kJ/mol]      191.80
End
  Frequencies[1/cm] 20
102.2311 145.6162 145.6162
254.4949 434.1059 496.3907

```

```

602.5216 677.1373 742.8056
1006.1160 1052.1702 1227.6240
1405.3450 1468.2553 1480.0857
1745.1541 2452.8439 3039.2963
3114.5912 3174.8351
ZeroEnergy[kJ/mol]          -76.10
ElectronicLevels[1/cm]      1
    0          2
End
!*****
Barrier TS14 INT5 P4
RRHO
Geometry[angstrom]          9
C   -0.425636    0.206064    0.067193
O   -0.871318    1.326935   -0.092143
C   -1.245792   -1.060924   -0.058808
H   -1.215910   -1.353930   -1.112469
H   -0.828902   -1.873967    0.534548
C    1.052289   -0.019362    0.007310
N    2.193482   -0.223158   -0.065974
H   -2.275369   -0.855081    0.226532
H   -0.355032    0.187132    1.736063
Core RigidRotor
SymmetryFactor 1
End
Rotor Hindered
Group 2 8
Axis 1 3
Potential[kJ/mol] 24
0.0
1.27194123824603
4.44118267947204
7.6804566023956
9.03623703701311
7.85677705572703
4.95433425888599
1.83396735938909
0.075316847379448
0.803481914799235
3.95391396483585
7.63256836704718
9.02745085035093
7.44104272821847
4.33249759200006
1.40067037196798
0.016259223342914
0.990109624703408
4.092344184944
7.59719837380859
9.03438387305732
7.51370597292085
4.27549580132935
1.23702725090021
End
Tunneling Eckart
ImaginaryFrequency[1/cm] 1383.6046
WellDepth[kJ/mol] 92.40

```

```

WellDepth[kJ/mol]    33.30
End
Frequencies[1/cm]  20
174.0690 187.1979 265.0230
421.5212 506.0490 543.2105
610.1661 627.6835 728.8824
1002.8822 1055.3619 1186.0447
1403.1669 1479.0501 1486.8348
1742.5459 2258.4587 3054.8681
3137.3841 3178.0182
ZeroEnergy[kJ/mol]    -77.40
ElectronicLevels[1/cm]  1
  0      2
End
!*****
Barrier TS15 INT5 P5
RRHO
Geometry[angstrom]    9
C   -0.310687    0.527182    0.408540
O   -0.868530    1.354743   -0.294369
C   -1.281700   -1.294700   -0.095820
H   -1.035936   -1.322914   -1.148311
H   -0.764334   -1.986617    0.557108
C    1.047279    0.024054    0.078946
N    2.112807   -0.374459   -0.155865
H   -2.289028   -1.004616    0.168934
H   -0.591439    0.351855    1.457777
Core RigidRotor
SymmetryFactor    1
End
Rotor Hindered
Group 2 8
Axis 1 3
Potential[kJ/mol] 24
0.0
0.837700473432463
2.88165317956669
4.96293405290399
5.84277713951649
4.98632004242865
2.91552494264156
0.861326148269313
0.000788887638976
0.800416935455104
2.80723810557623
4.89198640913928
5.83928004399593
5.0764440873165
3.04796066684208
0.946550426562126
0.002563031614521
0.775205872091355
2.82282736510102
4.93997387891793
5.84173202745631
4.9779872363624
2.89136345423071

```

```

0.8405192043342
End
Tunneling   Eckart
  ImaginaryFrequency[1/cm] 490.6525
  WellDepth[kJ/mol]      68.20
  WellDepth[kJ/mol]      9.10
End
  Frequencies[1/cm] 20
143.6317 150.1111 236.1380
291.3741 433.0453 593.7990
614.6141 630.9230 904.2265
932.4602 1044.3170 1387.4141
1432.6508 1446.8454 1627.8504
2263.1225 3000.2002 3108.4727
3279.5266 3290.5715
  ZeroEnergy[kJ/mol]      -101.60
  ElectronicLevels[1/cm]      1
    0      2
End
!*****
Barrier TS16 INT2 P2
RRHO
  Geometry[angstrom]      9
C   0.436290   0.033779   0.059402
O   0.996474  -1.197203  -0.142723
H   0.329343  -0.013623   1.856427
C   1.172628   1.151842  -0.077762
H   0.693242   2.117949  -0.053825
H   2.248480   1.081821  -0.148338
H   0.412434  -1.880038   0.205614
C  -1.015941   0.089477  -0.006934
N  -2.172698   0.084454  -0.074650
Core MultiRotor
  SymmetryFactor 1.0
  InterpolationEnergyMax[kJ/mol] 1000
  PotentialEnergySurface[kJ/mol] ./TS16.dat
  InternalRotation
Group 7
Axis 1 2
Symmetry      1
  MassExpansionSize 3
  GridSize      100
End
  InternalRotation
Group 5 6 9
Axis 1 4
Symmetry      1
  MassExpansionSize 3
  GridSize      100
End
End
Tunneling   Eckart
  ImaginaryFrequency[1/cm] 1279.0235
  WellDepth[kJ/mol]      146.00
  WellDepth[kJ/mol]      33.20
End
  Frequencies[1/cm] 20

```

```

189.2045 286.3709 298.5808
421.2752 514.1961 529.0157
616.8174 662.7227 696.8953
807.6498 906.0247 985.7958
1247.0125 1322.9145 1436.8579
1645.0141 2383.4583 3195.2091
3306.7626 3826.3145
ZeroEnergy[kJ/mol]          -46.60
ElectronicLevels[1/cm]      1
    0          2
End
End

```

## 5.2 Anti-VyA + CN

```

!*****
!          GLOBAL SECTION
!*****
!!!!!!!!!!!!!!!!!!!!!!!!!!!!!!!!!!!!!!!!!!!!!!!!!!!!!!!!!!!!!!
!
!
TemperatureList [K]          30 40 50 60 70 80 90 100 110 120
                             130 140 150 160 170 180
                             190 200 210 220 230 240
                             250 260 270 280 290 300
                             310 320 330 340 350 360
                             370 380 390 400 410 420
                             430 440 450 460 470 480
                             490 500 510 520 530 540
                             550 560 570 580 590 600

PressureList [atm]          1.e-8 1
EnergyStepOverTemperature   .2
ExcessEnergyOverTemperature 30
ModelEnergyLimit [kcal/mol] 400
CalculationMethod           low-eigenvalue
WellCutoff                  20
ChemicalEigenvalueMax       0.2
ReductionMethod             projection
AtomDistanceMin [bohr]      1.3
RateOutput                  rate.out

```

```

!!!!!!!!!!!!!!!!!!!!!!!!!!!!!!!!!!!!!!!!!!!!!!!!!!!!!!!!!!!!!!
!*****
!          MODEL SECTION
!*****
!!!!!!!!!!!!!!!!!!!!!!!!!!!!!!!!!!!!!!!!!!!!!!!!!!!!!!!!!!!!!!

```

```

Model
  EnergyRelaxation
    Exponential
      Factor [1/cm]          260
      Power                  0.85
      ExponentCutoff         15
End

```

CollisionFrequency

```

LennardJones
  Epsilons[K]           127.697  1280.940
  Sigmas[angstrom]     3.462    4.495
  Masses[amu]          39.948  70.07098
End

```

```

!*****
!
!*****
!!!!!!!!!!!!!!!!!!!!!!!!!!!!!!!!!!!!!!!!!!!!!!!!!!!!!!!!!!!!!!!!!!!!
!*****
! REACTANT syn-Vy + CN
!*****

```

```

Bimolecular REACS
Fragment C2H4O
RRHO
Geometry[angstrom]      7
C   0.035965   0.414901   0.000010
O  -1.132689  -0.296697   0.000001
H  -0.067014   1.495467   0.000038
C   1.225337  -0.181204  -0.000014
H   1.314586  -1.259393  -0.000042
H   2.120535   0.422594  -0.000006
H  -1.874405   0.312722   0.000028

```

```

Core RigidRotor
SymmetryFactor  1.0000000000000000
End
  Frequencies[1/cm]      15
274.4399 479.1481 718.0128
855.2196 961.1790 976.6347
1145.8603 1295.2582 1351.8397
1446.9336 1727.9531 3169.9747
3186.3356 3281.3570 3876.6283
ZeroEnergy[kJ/mol]      0.
ElectronicLevels[1/cm]  1
  0          1

```

```

!*****
End

```

```

!*****
Fragment CN
RRHO
Geometry[angstrom]      2
C  -1.875383   0.453789   0.017829
N  -0.716421   0.453789   0.017829

```

```

Core RigidRotor
SymmetryFactor  1.0000000000000000
End
  Frequencies[1/cm]      1
2411.1619
ZeroEnergy[kJ/mol]      0.
ElectronicLevels[1/cm]  1
  0          2

```

```

!*****
End

```

```

!*****
GroundEnergy[kJ/mol]  0.0
End

```

```

!*****
!  PRODUCT P1
!*****
Bimolecular P1
Fragment C3H3NO
RRHO
Geometry[angstrom]          8
C   -2.382269    0.945131   -0.000362
H   -2.955911    0.024193   -0.000477
C   -1.042183    0.938093   -0.000079
H   -0.479726    1.862579    0.000035
O   -3.073123    2.105766   -0.000511
H   -4.016875    1.922791   -0.000715
C   -0.329433   -0.294769    0.000078
N    0.266749   -1.294247    0.000210
Core RigidRotor
SymmetryFactor  1.0000000000000000
End
  Frequencies[1/cm]    18
177.5084 194.3963 364.1156
441.7379 516.5180 559.1184
828.9453 964.4885 1025.9549
1180.2978 1229.4947 1356.0995
1363.8277 1729.7660 2261.0347
3189.9610 3217.6987 3861.8155
ZeroEnergy[kJ/mol]      0.
ElectronicLevels[1/cm]      1
  0.0000000000000000    1.0000000000000000
!*****
End
!*****
Fragment HYDROGEN
Atom
Name H
ElectronicLevels[1/cm]      1
  0      2
!*****
End
!*****
GroundEnergy[kJ/mol] -98.60
End
!*****
!  PRODUCT P2
!*****
Bimolecular P2
Fragment C3H3NO
RRHO
Geometry[angstrom]          8
C    0.443981    0.039262   -0.000001
C    1.198529    1.140439    0.000000
H    2.276862    1.062360    0.000002
O    0.990152   -1.212171   -0.000000
H    0.291376   -1.874294    0.000005
C   -0.994930    0.104485   -0.000001
N   -2.157744    0.098859    0.000001
H    0.729281    2.112173    0.000000
Core RigidRotor

```

```

SymmetryFactor    1.0000000000000000
End
  Frequencies[1/cm]    18
193.3575 232.2772 291.3889
422.2905 608.0666 637.7575
739.3691 797.2002 886.2303
985.2469 1240.7954 1342.9461
1440.1943 1714.9378 2258.4905
3190.6084 3296.5683 3843.1869
ZeroEnergy[kJ/mol]          0.
ElectronicLevels[1/cm]          1
  0.0000000000000000          1.0000000000000000
  !*****
End
!*****
Fragment HYDROGEN
  Atom
  Name H
  ElectronicLevels[1/cm]          1
  0          2
  !*****
End
!*****
GroundEnergy[kJ/mol] -85.10
End
!*****
! PRODUCT P3
!*****
Bimolecular P3
Fragment C3H3NO
RRHO
Geometry[angstrom]          8
C   -1.345923    0.104809   -0.027948
N   -2.377393   -0.417343   -0.125136
C   -0.023598    0.714489    0.099916
H    0.191721    1.363573   -0.749015
H   -0.003508    1.324207    1.009576
C    1.076489   -0.337387    0.222890
O    2.175451   -0.176213   -0.242639
H    0.808118   -1.248133    0.787358
Core RigidRotor
SymmetryFactor    1.0000000000000000
End
  Frequencies[1/cm]    18
61.1798 181.1152 351.3555
469.1521 521.0854 737.8674
964.6614 1046.0583 1050.0161
1227.9169 1297.3395 1419.0734
1451.8066 1794.2927 2284.8892
2973.3366 3061.7878 3137.0962
ZeroEnergy[kJ/mol]          0.
ElectronicLevels[1/cm]          1
  0.0000000000000000          1.0000000000000000
  !*****
End
!*****
Fragment HYDROGEN

```



```

Atom
Name H
ElectronicLevels[1/cm]      1
  0      2
  !*****
End
!*****
GroundEnergy[kJ/mol] -114.90
End
!*****
! PRODUCT P4
!*****
Bimolecular P4
Fragment C3H3NO
RRHO
Geometry[angstrom]          8
C   0.435388   0.206437   -0.000013
O   0.875395   1.331535   -0.000061
C  -1.033749  -0.009358    0.000014
N  -2.179015  -0.205280    0.000032
C   1.253779  -1.050580    0.000026
H   1.002871  -1.648213    0.879919
H   1.002857  -1.648277   -0.879819
H   2.311705  -0.797822    0.000008
Core RigidRotor
SymmetryFactor  1.0000000000000000
End
  Frequencies[1/cm]   18
  136.5165 177.0018 250.3718
  433.1108 589.6386 595.9424
  724.1801 993.0990 1050.8204
  1209.4700 1405.3542 1472.7222
  1480.6838 1770.4367 2246.8223
  3053.6406 3124.0572 3176.6486
ZeroEnergy[kJ/mol]          0.
ElectronicLevels[1/cm]      1
  0.0000000000000000      1.0000000000000000
  !*****
End
!*****
Fragment HYDROGEN
Atom
Name H
ElectronicLevels[1/cm]      1
  0      2
  !*****
End
!*****
GroundEnergy[kJ/mol] -119.50
End
!*****
! PRODUCT P5
!*****
Bimolecular P5
Fragment C2HNO
RRHO
Geometry[angstrom]          5

```

```

C   -0.692079    0.426205   -0.000021
O   -1.562173   -0.407499    0.000045
C    0.737630    0.069129   -0.000014
N    1.873815   -0.174115   -0.000009
H   -0.892626    1.506792   -0.000090
Core RigidRotor
SymmetryFactor  1.0000000000000000
End
  Frequencies[1/cm]    9
224.6826 297.9226 616.1239
927.4680 998.9194 1413.0009
1751.8461 2250.0589 3033.9889
ZeroEnergy[kJ/mol]      0.
ElectronicLevels[1/cm]      1
  0.0000000000000000    1.0000000000000000
  !*****
End
!*****
Fragment CH3
RRHO
Geometry[angstrom]      4
C   -0.204697    0.140730   -0.218631
H    0.303637   -0.757915    0.092664
H    0.303657    0.859632   -0.841227
H   -1.221388    0.320469    0.092664
Core RigidRotor
SymmetryFactor  1.0000000000000000
End
  Frequencies[1/cm]    6
488.3360 1430.3272 1430.3273
3136.9147 3319.3943 3319.3943
ZeroEnergy[kJ/mol]      0.
ElectronicLevels[1/cm]      1
  0      2
  !*****
End
!*****
GroundEnergy[kJ/mol] -116.00
End
!*****
! PRODUCT P6
!*****
Bimolecular P6
Fragment C3H3N
RRHO
Geometry[angstrom]      7
C   -0.608242    0.671357    0.000006
H   -1.181236   -0.247803    0.000007
C    0.727830    0.662097    0.000002
H    1.269248   -0.274564    0.000000
H    1.298781    1.581579    0.000001
C   -1.365754    1.888472    0.000009
N   -1.997712    2.864467    0.000012
Core RigidRotor
SymmetryFactor  1.0000000000000000
End
  Frequencies[1/cm]    15

```

```

230.6762 340.8485 566.7814
702.0030 880.3037 987.8886
1010.4583 1111.1755 1322.6420
1453.7345 1675.5742 2263.3312
3172.0516 3204.5565 3270.4973
ZeroEnergy[kJ/mol]          0.
ElectronicLevels[1/cm]          1
0.0000000000000000          1.0000000000000000
!*****
End
!*****
Fragment HO
RRHO
Geometry[angstrom]          2
O   -1.121951   0.449697   -0.040988
H   -1.446314   1.365670   -0.040988
Core RigidRotor
SymmetryFactor  1.0000000000000000
End
  Frequencies[1/cm]    1
3757.1215
ZeroEnergy[kJ/mol]          0.
ElectronicLevels[1/cm]          1
0      2
!*****
End
!*****
GroundEnergy[kJ/mol] -101.50
End
!*****
! PRODUCT P7
!*****
Bimolecular P7
Fragment C3H3NO
RRHO
Geometry[angstrom]          8
C   -2.378164   1.002522   0.000021
C   -1.037611   1.032446   0.001148
O   -3.122332   2.127217   0.000016
H   -4.056895   1.902113   -0.000884
H   -0.492664   0.099905   0.001093
C   -0.293089   2.247818   0.002424
N    0.338404   3.224906   0.003476
H   -2.907880   0.056270   -0.000931
Core RigidRotor
SymmetryFactor  1.0000000000000000
End
  Frequencies[1/cm]    18
149.3755 270.1390 371.8154
405.5380 590.2572 728.6013
744.5695 949.8776 952.8482
1118.2506 1256.9964 1305.2108
1437.4753 1726.3904 2260.3805
3191.4026 3239.6076 3862.2591
ZeroEnergy[kJ/mol]          0.
ElectronicLevels[1/cm]          1
0.0000000000000000          1.0000000000000000

```

```

!*****
End
!*****
Fragment HYDROGEN
Atom
Name H
ElectronicLevels[1/cm]      1
0      2
!*****
End
!*****
GroundEnergy[kJ/mol] -109.40
End
!*****
! INT1
!*****
Well INT1
Species
RRHO      ! well
Geometry[angstrom]          9
C   -1.150932   0.386547   -0.375960
O   -1.673440   -0.666779    0.316802
H   -1.273802   0.390953   -1.453333
C    0.096160   0.936729    0.235924
H   -0.041662   1.053629    1.313575
H    0.313950   1.920135   -0.184541
H   -2.377469   -1.073997   -0.196910
C    1.265314   0.068067    0.007300
N    2.169367   -0.628796   -0.203783
Core RigidRotor
SymmetryFactor 1.0000000000000000
End
Frequencies[1/cm]          21
90.2495 192.4609 355.2716
370.9197 385.7554 547.5608
686.0015 892.0347 917.4241
1031.7060 1199.8734 1230.3189
1311.9987 1329.0932 1458.1137
1464.5611 2271.7296 3072.9575
3124.8619 3178.8569 3852.2232
ZeroEnergy[kJ/mol]        -230.30
ElectronicLevels[1/cm]      1
0.0000000000000000      2.0000000000000000
End
End
!*****
! INT1b
!*****
Well INT1b
Species
RRHO      ! well
Geometry[angstrom]          9
C    0.607662    0.081245    0.484541
O    1.606201   -0.525769   -0.260327
H    0.752419    0.120428    1.561019
C   -0.106259    1.228763   -0.169707
H    0.170229    1.443178   -1.195284

```

```
H   -0.407234    2.069767    0.442932
H    1.605880   -1.469028   -0.065629
C   -0.847937   -0.061981    0.028439
N   -1.815698   -0.780466   -0.084464
```

Core RigidRotor

SymmetryFactor 1.0000000000000000

End

Frequencies[1/cm] 21

```
193.0045 303.4894 341.8641
407.9997 480.9786 632.8671
744.7724 853.2031 947.4853
1046.2651 1060.5644 1126.4644
1202.6223 1291.0868 1403.4067
1450.6352 1912.9179 3140.8465
3143.1149 3245.5677 3827.3069
```

ZeroEnergy[kJ/mol] -115.10

ElectronicLevels[1/cm] 1

0.0000000000000000 2.0000000000000000

End

End

!\*\*\*\*\*

! INT2

!\*\*\*\*\*

Well INT2

Species

RRHO ! well

Geometry[angstrom] 9

```
C   0.424723   -0.018446    0.383703
O   1.006460   -1.208950   -0.140369
H   0.560788   -0.108137    1.466272
C   1.086852    1.217589   -0.126004
H   2.154941    1.311218    0.005584
H   0.522218    2.012839   -0.587756
H   0.992787   -1.145271   -1.102593
C   -1.033056    0.018850    0.124049
N   -2.170629    0.053585   -0.102315
```

Core RigidRotor

SymmetryFactor 1.0000000000000000

End

Frequencies[1/cm] 21

```
65.8557 190.8567 232.0591
334.9546 393.3755 509.3741
574.5730 613.0193 807.2125
976.1030 1089.5257 1125.7179
1237.7492 1346.9905 1413.0694
1469.2960 2274.6364 3057.1023
3184.8072 3308.6257 3809.8375
```

ZeroEnergy[kJ/mol] -197.90

ElectronicLevels[1/cm] 1

0.0000000000000000 2.0000000000000000

End

End

!\*\*\*\*\*

! INT3

!\*\*\*\*\*

Well INT3

Species

```

RRHO      ! well
Geometry[angstrom]      9
C      0.988855      -0.451602      0.291772
O      2.181772      0.091644      -0.250676
H      0.700065      -1.384477      -0.203082
C      -0.141240      0.528383      0.246121
H      0.057252      1.572710      0.446049
H      2.046477      0.238001      -1.192277
C      -1.461617      0.120365      0.020576
N      -2.547823      -0.241163      -0.175942
H      1.225660      -0.692625      1.332968
Core RigidRotor
SymmetryFactor      1.0000000000000000
End
      Frequencies[1/cm]      21
47.0339 185.5126 325.0330
394.7722 428.4037544.6996
577.9890 887.5487 1041.8618
1071.4663 1120.2467 1195.5659
1320.2677 1398.8290 1428.7017
1498.8184 2316.6123 3036.8405
3078.0715 3225.4018 3834.6120
ZeroEnergy[kJ/mol]      -234.70
ElectronicLevels[1/cm]      1
      0.0000000000000000      2.0000000000000000
End
End

```

!\*\*\*\*\*

! INT4

!\*\*\*\*\*

```

Well INT4
Species
RRHO      ! well
Geometry[angstrom]      9
C      0.338179      0.053219      0.000062
O      0.862528      1.306811      0.000292
C      1.325205      -1.052983      0.000045
H      1.968304      -0.991214      0.883150
H      0.816834      -2.015413      -0.000143
H      0.152117      1.959414      0.000287
C      -1.050149      -0.116959      -0.000144
N      -2.208459      -0.235861      -0.000314
H      1.968528      -0.990987      -0.882881
Core RigidRotor
SymmetryFactor      1.0000000000000000
End
      Frequencies[1/cm]      21
90.6477 190.0395 238.3457
385.8546 404.4841 461.3178
621.5631 749.7738 1015.0283
1023.8833 1172.6828 1366.3166
1411.4686 1441.0116 1478.6647
1511.7408 2329.9872 3034.6289
3090.0035 3159.0180 3814.6683
ZeroEnergy[kJ/mol]      -273.20
ElectronicLevels[1/cm]      1
      0.0000000000000000      2.0000000000000000

```

```

End
End
!*****
! INT5
!*****
Well INT5
Species
RRHO ! well
Geometry[angstrom] 9
C 0.409848 -0.041316 0.380390
O 1.041703 -1.144416 -0.140658
C 1.125194 1.214977 -0.154543
H 1.065265 1.238867 -1.241852
H 0.635570 2.101157 0.248889
C -1.038927 0.003264 0.057753
N -2.171740 0.059832 -0.186926
H 2.168228 1.191981 0.156014
H 0.521602 -0.063452 1.472807
Core RigidRotor
SymmetryFactor 1.0000000000000000
End
Frequencies[1/cm] 21
185.9006 214.4629 245.7042
293.8295 505.1179 579.8116
800.6449 894.3748 985.6645
1041.5556 1122.4717 1232.4704
1350.7839 1406.0258 1493.4699
1510.1447 2273.0772 3017.1289
3071.1608 3161.0452 3171.1542
ZeroEnergy[kJ/mol] -175.10
ElectronicLevels[1/cm] 1
0.0000000000000000 2.0000000000000000
End
End
!*****
! BARRIERLESS ENTRANCE CHANNEL - PHASE SPACE THEORY
!*****
Barrier B0 REACS INT1
RRHO
Stoichiometry C3H4N1O1
Core PhaseSpaceTheory
FragmentGeometry[angstrom] 7
C 0.035965 0.414901 0.000010
O -1.132689 -0.296697 0.000001
H -0.067014 1.495467 0.000038
C 1.225337 -0.181204 -0.000014
H 1.314586 -1.259393 -0.000042
H 2.120535 0.422594 -0.000006
H -1.874405 0.312722 0.000028
FragmentGeometry[angstrom] 2
C -1.875383 0.453789 0.017829
N -0.716421 0.453789 0.017829
SymmetryFactor 1.0000000000000000
PotentialPrefactor[au] 63.49
PotentialPowerExponent 6
End
Frequencies[1/cm] 16

```

274.4399 479.1481 718.0128  
855.2196 961.1790 976.6347  
1145.8603 1295.2582 1351.8397  
1446.9336 1727.9531 3169.9747  
3186.3356 3281.3570 3876.6283  
2411.1619  
ZeroEnergy[kJ/mol] 0.  
ElectronicLevels[1/cm] 1  
0.0000000000000000 2.0000000000000000  
End

!\*\*\*\*\*

Barrier TS1 INT1 INT1b  
RRHO

Geometry[angstrom] 9  
C 0.667077 0.096591 0.485498  
O 1.634643 -0.636635 -0.148131  
H 0.807100 0.126835 1.556499  
C -0.094898 1.197815 -0.185872  
H 0.167373 1.426518 -1.215603  
H -0.355272 2.063858 0.415481  
H 1.427359 -0.716241 -1.085950  
C -0.934516 -0.001828 -0.000229  
N -1.827872 -0.791445 -0.050937

Core RigidRotor

SymmetryFactor 1

End

Rotor Hindered

Group 7

Axis 1 2

Potential[kJ/mol] 24

0.0

0.384531131041655

1.47030644085475

2.89502436536483

4.31435212655795

5.6060688479987

6.79707940421117

7.8849866795811

8.74069374275182

9.06711207726815

8.43506397539111

6.49114222014795

3.19850930340067

-0.960534345751633

-5.07495242028298

-8.14490401874958

-9.42151925209061

-8.6796217644428

-6.31733649378974

-3.27931161061933

-0.698192063120729

0.661604741482321

0.780898464158717

0.297642969226459

End

Tunneling Eckart

ImaginaryFrequency[1/cm] 577.5630



```

WellDepth[kJ/mol]    123.20
WellDepth[kJ/mol]    8.0
End
Frequencies[1/cm] 20
138.0329 249.1384 337.9022
415.4476 478.4118 783.9889
849.4804 941.7737 1007.2288
1077.2953 1117.7864 1207.2879
1324.7120 1423.5397 1453.1612
2030.3371 3108.0357 3199.1384
3229.6599 3820.9414
ZeroEnergy[kJ/mol]    -107.10
ElectronicLevels[1/cm] 1
0      2
End
!*****
Barrier TS1b INT1b INT2
RRHO
Geometry[angstrom]    9
C      0.567096    0.035035    0.461466
O      1.512286    -0.722091    -0.229405
H      0.712619    0.082565    1.540513
C      0.009785    1.273776    -0.165612
H      0.165385    1.425643    -1.224305
H     -0.316229    2.095358    0.455608
H      2.297633    -0.175153    -0.345094
C     -0.830667    -0.191724    0.084663
N     -1.919283    -0.622029    -0.124941
Core      RigidRotor
SymmetryFactor    1
End
Rotor Hindered
Group 7
Axis 1 2
Potential[kJ/mol] 24
0.0
0.489270730274633
1.89197199562412
3.70901043041916
5.04851037719963
5.00146143429436
3.18676419744718
0.033827921400906
-3.41981157783085
-6.04393324540262
-7.09080733819441
-6.46648009661861
-4.74323869406182
-2.8628469386589
-1.66592431936764
-1.39529596020829
-1.59447630297682
-1.55602531634445
-0.874531418291028
0.290695245081544
1.33462459496117
1.65246256235773

```

```

1.16385733293389
0.37928981933274
End
Tunneling   Eckart
  ImaginaryFrequency[1/cm]  677.9480
  WellDepth[kJ/mol]        15.50
  WellDepth[kJ/mol]        98.30
End
  Frequencies[1/cm]  20
211.4278 226.3736 351.7120
406.1711 492.1999 745.8929
824.8348 873.6945 894.5697
1080.2098 1167.7307 1205.7098
1306.4266 1393.4610 1449.8594
2042.6957 3107.2677 3170.6329
3294.3832 3813.4662
  ZeroEnergy[kJ/mol]        -107.10
  ElectronicLevels[1/cm]    1
    0      2
End
!*****
Barrier TS3 INT1 INT3
RRHO
  Geometry[angstrom]      9
C   1.250669   0.421444  -0.080454
O   1.448643  -0.922534  -0.134443
H   2.114504   1.008116   0.195654
C  -0.102803   0.996542   0.152658
H   0.500170   1.057870  -0.988633
H  -0.181906   1.956790   0.641123
H   0.610965  -1.384199   0.013819
C  -1.210093   0.115617   0.129903
N  -2.059686  -0.679345   0.077561
Core MultiRotor
  SymmetryFactor  1.0
  InterpolationEnergyMax[kJ/mol]  1000
  PotentialEnergySurface[kJ/mol]  ./TS3.dat
  InternalRotation
Group 7
Axis 1 2
Symmetry 1
  MassExpansionSize 3
  GridSize 100
End
  InternalRotation
Group 7 9
Axis 4 1
Symmetry 1
  MassExpansionSize 3
  GridSize 100
End
End
Tunneling   Eckart
  ImaginaryFrequency[1/cm] 1924.2687
  WellDepth[kJ/mol]        164.10
  WellDepth[kJ/mol]        168.50
End

```

```

Frequencies[1/cm] 20
130.8542 206.6971 331.0802
412.6942 432.8810 657.4672
683.1535 813.3618 895.1560
1076.6411 1193.8244 1273.1801
1327.2376 1359.2747 1433.7286
2145.0885 2327.6981 3224.0019
3234.3662 3749.8659
ZeroEnergy[kJ/mol] -66.20
ElectronicLevels[1/cm] 1
0 2
End
!*****
Barrier TS3b INT2 P6
RRHO
Geometry[angstrom] 9
C 0.255727 0.377936 0.511840
O 1.217745 -1.312316 -0.036073
H 0.515450 0.158045 1.537357
C 1.023432 1.184436 -0.249777
H 0.702847 1.496782 -1.234800
H 1.999153 1.490612 0.098749
H 1.018149 -1.323017 -0.985933
C -1.099169 0.063911 0.121422
N -2.190669 -0.166943 -0.188721
Core MultiRotor
SymmetryFactor 1.0
InterpolationEnergyMax[kJ/mol] 1000
PotentialEnergySurface[kJ/mol] ./TS3b.dat
InternalRotation
Group 7
Axis 1 2
Symmetry 1
MassExpansionSize 3
GridSize 100
End
InternalRotation
Group 6 8
Axis 4 1
Symmetry 1
MassExpansionSize 3
GridSize 100
End
End
Tunneling Eckart
ImaginaryFrequency[1/cm] 552.4366
WellDepth[kJ/mol] 105.50
WellDepth[kJ/mol] 9.10
End
Frequencies[1/cm] 20
144.9891 171.3810 223.1567
281.2298 429.4659 567.6507
670.0482 796.9721 875.3571
974.7342 1047.7554 1114.9621
1310.1136 1454.4357 1640.7606
2416.6629 3180.9562 3233.0109
3288.9018 3757.0446

```

```

ZeroEnergy[kJ/mol]          -92.40
ElectronicLevels[1/cm]      1
  0          2
End
!*****
Barrier TS4 INT1 P1
RRHO
  Geometry[angstrom]        9
C    0.932324   -0.356049    0.095185
O    2.211832    0.008191   -0.097272
H    0.743844   -1.349749    0.485472
C   -0.068127    0.520948   -0.119763
H    0.123225    1.456674   -0.627959
H   -0.169327    1.569052    1.401728
H    2.800709   -0.710917    0.150147
C   -1.424189    0.056413   -0.047216
N   -2.520454   -0.317557    0.002945
Core RigidRotor
SymmetryFactor  1
End
Rotor Hindered
Group 7 9
Axis 1 2
Potential[kJ/mol] 71
0.0
0.59625097997582
2.397917339988
5.41891505998251
9.66757115999712
15.1459804599881
21.8523572800109
29.7758250399738
38.9004304000025
49.1981099999919
60.6221114199855
73.0912608399592
86.4504989399507
100.329043880004
113.033713519951
121.384234139958
126.285356079995
128.336584739998
107.174738319975
98.648555459954
89.7464586199817
80.7054481999558
71.7082789799917
62.9006068600177
54.4030567599918
46.3184667400128
38.7369847799789
31.738990399964
25.3946778799843
19.7665478400154
14.9096989599514
10.8744797199677
7.70339933996524

```

5.43433305994654  
4.09732777998215  
3.72064030000843  
4.327261639946  
5.93561566001313  
8.56333763998691  
12.223210999997  
16.9253913400155  
22.6801964999538  
29.4931558999508  
37.3645578800165  
46.2943189799546  
56.2772576599969  
67.2977559799733  
79.3375416599702  
92.3635437400037  
106.32725584  
121.146581140016  
136.650856679989  
127.82194749999  
129.389225679984  
114.65340119999  
109.383883700019  
103.114494080018  
95.8345036999845  
87.6758375999543  
78.8868573999935  
69.7464055599653  
60.5167074199471  
51.4286718400115  
42.6805693599874  
34.4435899599944  
26.8618734799873  
20.0573258599888  
14.1253821799978  
9.15338293998502  
5.20469638000236  
2.3354921199541

End

Tunneling Eckart

ImaginaryFrequency[1/cm] 1130.2824

WellDepth[kJ/mol] 153.10

WellDepth[kJ/mol] 21.40

End

Frequencies[1/cm] 20

176.9677 197.0173 349.6582

381.0129 442.2342 487.2426

542.0210 563.8588 917.9680

995.4219 1019.5905 1182.9001

1237.7799 1353.5869 1362.6240

1708.4642 2383.7014 3200.2767

3218.0276 3855.5901

ZeroEnergy[kJ/mol] -77.20

ElectronicLevels[1/cm] 1

0 2

End

!\*\*\*\*\*

```

Barrier TS5 INT3 P7
RRHO
  Geometry[angstrom]          9
C   -0.905315   -0.314056   -0.082033
O   -2.182927    0.122117   -0.089299
H   -0.800137   -1.097928    1.581223
C    0.107487    0.562830    0.086076
H   -0.086297    1.593702    0.348374
H   -2.782624   -0.625632   -0.169561
C    1.456715    0.114741   -0.008562
N    2.556411   -0.243981   -0.082571
H   -0.715719   -1.320310   -0.440533
Core RigidRotor
  SymmetryFactor  1
End
Rotor Hindered
Group 6 8
Axis 1 2
Potential[kJ/mol] 24
0.0
4.88679733997964
19.8201027365685
44.4155281349784
76.3147442537587
91.9794744907802
91.2265299511137
69.5404394183666
43.4284832272013
20.3078324451242
2.59075316491224
-7.86425219257063
-9.7514228684782
-2.54609923753298
13.5250010601904
37.4939882534694
67.672350897104
101.810903165664
88.117441388147
76.0142883291344
57.1061701399517
35.8955218331025
17.2453034784595
4.56195809335238
End
Tunneling   Eckart
  ImaginaryFrequency[1/cm]  1172.0875
  WellDepth[kJ/mol]         157.80
  WellDepth[kJ/mol]         32.50
End
  Frequencies[1/cm]  20
174.2402 176.1744 357.3691
430.5634 482.3635 496.3392
533.9950 574.1246 832.2724
1026.5000 1063.9784 1183.7277
1222.6019 1345.4755 1362.1333
1674.7178 2432.7337 3185.7154
3229.2160 3853.7192

```

```

ZeroEnergy[kJ/mol]          -76.90
ElectronicLevels[1/cm]      1
  0          2
End
!*****
Barrier TS8 INT1 P3
RRHO
Geometry[angstrom]         9
C    0.973209   -0.456428   -0.014424
O    2.161746   -0.170047   -0.093295
H    0.648941   -1.485026    0.189502
C   -0.072654    0.631607   -0.071866
H    0.065333    1.226198   -0.977742
H    0.124238    1.302403    0.776609
H    2.684898    0.765786    0.910022
C   -1.439801    0.121175   -0.002176
N   -2.511700   -0.318159    0.054110
Core MultiRotor
SymmetryFactor 1.0
InterpolationEnergyMax[kJ/mol] 1000
PotentialEnergySurface[kJ/mol] ./TS8.dat
InternalRotation
Group 3 7
Axis 1 2
Symmetry 1
  MassExpansionSize 5
  GridSize 100
End
InternalRotation
Group 2 8
Axis 1 4
Symmetry 1
  MassExpansionSize 5
  GridSize 100
End
End
Tunneling Eckart
ImaginaryFrequency[1/cm]    2023.5248
WellDepth[kJ/mol] 156.90
WellDepth[kJ/mol] 41.50
End
Frequencies[1/cm] 20
70.8016 160.4364 214.2732
350.1666 451.1130 530.6838
658.9097 735.1715 973.2821
1027.8267 1059.2225 1224.4017
1302.6205 1400.1727 1440.4622
1746.6984 2290.6437 3020.9551
3047.5858 3105.0041
ZeroEnergy[kJ/mol]          -73.40
ElectronicLevels[1/cm]      1
  0          2
End
!*****
Barrier TS10 INT2 INT4
RRHO
Geometry[angstrom]         9

```

```

C    0.302171   -0.068947    0.490469
O    0.997951   -1.130198   -0.185764
H    0.385532   -0.151275    1.574392
C    1.221740    0.927431   -0.157514
H    0.828727    1.513614   -0.979728
H    1.998643    1.360990    0.460350
H    1.704876   -0.199318   -0.678716
C   -1.111398    0.022089    0.103609
N   -2.229604    0.112745   -0.193324

```

Core RigidRotor

SymmetryFactor 1

End

Rotor Hindered

Group 5 6 9

Axis 1 4

Potential[kJ/mol] 18

0.0

1.56583272520122

-3.05198596261307

-4.10440274574545

3.32886687977174

15.3285021308439

17.6038989771894

7.54679094859423

-6.44584221874153

27.2715115269646

-6.42704752899065

6.89025819012119

15.4059708955886

12.1507874326697

1.13522766911968

-7.4575030457187

-8.35931501190985

0.753203914369287

End

Tunneling Eckart

ImaginaryFrequency[1/cm] 2114.0032

WellDepth[kJ/mol] 134.10

WellDepth[kJ/mol] 209.40

End

Frequencies[1/cm] 20

196.9441 221.9988 381.7461

528.6942 557.9973 722.2595

838.4083 962.9805 1010.9513

1073.0214 1109.6784 1154.9159

1258.1904 1382.2607 1437.4478

1997.5196 2278.2297 3108.6690

3144.5096 3265.0793

ZeroEnergy[kJ/mol] -63.80

ElectronicLevels[1/cm] 1

0 2

End

!\*\*\*\*\*

Barrier TS12 INT2 INT5

RRHO

Geometry[angstrom] 9

```

C    0.334038   -0.054029    0.133156

```



```

O    0.929903   -1.280255   -0.049322
H    0.732929    0.651726    1.118530
C    1.132907    1.179164   -0.041148
H    0.638686    2.112256   -0.261441
H    2.206066    1.076333   -0.087525
H    1.472745   -1.238061   -0.848368
C   -1.091167    0.006170    0.023773
N   -2.249515    0.075763   -0.029666

Core MultiRotor
SymmetryFactor 1.0
InterpolationEnergyMax[kJ/mol] 1000
PotentialEnergySurface[kJ/mol] ./TS12.dat
InternalRotation

Group 7 9
Axis 1 2
Symmetry 1
MassExpansionSize 3
GridSize 100
End
InternalRotation

Group 8 5
Axis 4 1
Symmetry 1
MassExpansionSize 3
GridSize 100
End
End

Tunneling Eckart
ImaginaryFrequency[1/cm] 1972.0316
WellDepth[kJ/mol] 144.30
WellDepth[kJ/mol] 122.20
End
Frequencies[1/cm] 20
189.8434 242.4808 291.1496
391.0150 422.7216 559.6722
595.3947 669.3678 763.0413
961.0849 1176.9525 1286.1121
1308.6600 1390.4744 1433.0032
2230.9042 2360.3820 3188.9666
3320.1960 3747.1329
ZeroEnergy[kJ/mol] -52.90
ElectronicLevels[1/cm] 1
0 2

End
!*****
Barrier TS13 INT4 P4
RRHO
Geometry [angstrom] 9
C    0.404534    0.110560    0.080546
O    0.933802    1.210862    0.154848
C    1.145341   -1.181204   -0.032381
H    2.198169   -1.021530    0.189752
H    0.716415   -1.928851    0.637712
H    1.425798    1.899735   -1.094031
C   -1.063633    0.018064    0.003480
N   -2.214645   -0.085852   -0.057717
H    1.036995   -1.560560   -1.054883

```

```

Core RigidRotor
  SymmetryFactor 1
End
Tunneling Eckart
  ImaginaryFrequency[1/cm] 1939.2933
  WellDepth[kJ/mol] 191.80
  WellDepth[kJ/mol] 38.10
  End
  Frequencies[1/cm] 20
102.2311 145.6162 145.6162
254.4949 434.1059 496.3907
602.5216 677.1373 742.8056
1006.1160 1052.1702 1227.6240
1405.3450 1468.2553 1480.0857
1745.1541 2452.8439 3039.2963
3114.5912 3174.8351
  ZeroEnergy[kJ/mol] -81.40
  ElectronicLevels[1/cm] 1
    0 2
End
!*****
Barrier TS14 INT5 P4
RRHO
  Geometry[angstrom] 9
C -0.425636 0.206064 0.067193
O -0.871318 1.326935 -0.092143
C -1.245792 -1.060924 -0.058808
H -1.215910 -1.353930 -1.112469
H -0.828902 -1.873967 0.534548
C 1.052289 -0.019362 0.007310
N 2.193482 -0.223158 -0.065974
H -2.275369 -0.855081 0.226532
H -0.355032 0.187132 1.736063
Core RigidRotor
  SymmetryFactor 1
End
Rotor Hindered
Group 4 5 7 8
Axis 1 3
Potential[kJ/mol] 24
0.0
1.27194123824603
4.44118267947204
7.6804566023956
9.03623703701311
7.85677705572703
4.95433425888599
1.83396735938909
0.075316847379448
0.803481914799235
3.95391396483585
7.63256836704718
9.02745085035093
7.44104272821847
4.33249759200006
1.40067037196798
0.016259223342914

```

```

0.990109624703408
4.092344184944
7.59719837380859
9.03438387305732
7.51370597292085
4.27549580132935
1.23702725090021
End
Tunneling   Eckart
  ImaginaryFrequency[1/cm] 1383.6046
  WellDepth[kJ/mol]      92.50
  WellDepth[kJ/mol]      36.90
  End
  Frequencies[1/cm] 20
174.0690 187.1979 265.0230
421.5212 506.0490 543.2105
610.1661 627.6835 728.8824
1002.8822 1055.3619 1186.0447
1403.1669 1479.0501 1486.8348
1742.5459 2258.4587 3054.8681
3137.3841 3178.0182
  ZeroEnergy[kJ/mol]      -82.60
  ElectronicLevels[1/cm]
    0      2
End
!*****
Barrier TS15 INT5 P5
RRHO
  Geometry[angstrom]      9
C   -0.310687    0.527182    0.408540
O   -0.868530    1.354743   -0.294369
C   -1.281700   -1.294700   -0.095820
H   -1.035936   -1.322914   -1.148311
H   -0.764334   -1.986617    0.557108
C    1.047279    0.024054    0.078946
N    2.112807   -0.374459   -0.155865
H   -2.289028   -1.004616    0.168934
H   -0.591439    0.351855    1.457777
Core RigidRotor
  SymmetryFactor  1
End
Rotor Hindered
Group 4 5 7 8
Axis 1 3
Potential[kJ/mol] 24
0.0
0.837700473432463
2.88165317956669
4.96293405290399
5.84277713951649
4.98632004242865
2.91552494264156
0.861326148269313
0.000788887638976
0.800416935455104
2.80723810557623
4.89198640913928

```

```

5.83928004399593
5.0764440873165
3.04796066684208
0.946550426562126
0.002563031614521
0.775205872091355
2.82282736510102
4.93997387891793
5.84173202745631
4.9779872363624
2.89136345423071
0.8405192043342
End
Tunneling   Eckart
  ImaginaryFrequency[1/cm] 490.6525
  WellDepth[kJ/mol]      68.20
  WellDepth[kJ/mol]      9.10
End
  Frequencies[1/cm] 20
143.6317 150.1111 236.1380
291.3741 433.0453 593.7990
614.6141 630.9230 904.2265
932.4602 1044.3170 1387.4141
1432.6508 1446.8454 1627.8504
2263.1225 3000.2002 3108.4727
3279.5266 3290.5715
  ZeroEnergy[kJ/mol]      -106.90
  ElectronicLevels[1/cm]      1
    0      2
End
!*****
Barrier TS16 INT2 P2
RRHO
  Geometry[angstrom]      9
C   0.436290   0.033779   0.059402
O   0.996474  -1.197203  -0.142723
H   0.329343  -0.013623   1.856427
C   1.172628   1.151842  -0.077762
H   0.693242   2.117949  -0.053825
H   2.248480   1.081821  -0.148338
H   0.412434  -1.880038   0.205614
C  -1.015941   0.089477  -0.006934
N  -2.172698   0.084454  -0.074650
Core MultiRotor
  SymmetryFactor 1.0
  InterpolationEnergyMax[kJ/mol] 1000
  PotentialEnergySurface[kJ/mol] ./TS16.dat
  InternalRotation
Group 7
Axis 1 2
Symmetry      1
  MassExpansionSize 3
  GridSize      1000
End
  InternalRotation
Group 5 6 9
Axis 1 4

```

```

Symmetry          1
  MassExpansionSize 3
  GridSize        1000
End
End
Tunneling      Eckart
  ImaginaryFrequency[1/cm] 1279.0235
  WellDepth[kJ/mol]      146.00
  WellDepth[kJ/mol]      33.20
End
  Frequencies[1/cm] 20
189.2045 286.3709 298.5808
421.2752 514.1961 529.0157
616.8174 662.7227 696.8953
807.6498 906.0247 985.7958
1247.0125 1322.9145 1436.8579
1645.0141 2383.4583 3195.2091
3306.7626 3826.3145
  ZeroEnergy[kJ/mol]      -51.90
  ElectronicLevels[1/cm]          1
    0      2
End
End

```

## 6 Arrhenius plots

### 6.1 *syn*-VyA + CN

**Table 97** The Arrhenius-Kooij parameters for the *syn*-VyA + CN addition reaction.

|              | $A/\text{cm}^3 \text{ molecule}^{-1} \text{ s}^{-1}$ | $n$   | $E/\text{kJmol}^{-1}$ | $\text{rms}^a$         |
|--------------|------------------------------------------------------|-------|-----------------------|------------------------|
| <b>s-P1</b>  | $6.68 \times 10^{-11}$                               | 0.37  | -114.69               | $1.09 \times 10^{-12}$ |
| <b>s-P2</b>  | $1.67 \times 10^{-13}$                               | 1.02  | -484.24               | $1.08 \times 10^{-14}$ |
| <b>s-P3</b>  | $2.12 \times 10^{-10}$                               | 0.19  | -3.46                 | $5.32 \times 10^{-13}$ |
| <b>s-P4</b>  | $2.54 \times 10^{-13}$                               | 0.39  | -139.00               | $6.44 \times 10^{-15}$ |
| <b>s-P5</b>  | $3.56 \times 10^{-12}$                               | 0.57  | -214.95               | $8.98 \times 10^{-14}$ |
| <b>s-P6</b>  | $1.14 \times 10^{-10}$                               | -0.17 | 187.72                | $3.79 \times 10^{-12}$ |
| <b>s-P7</b>  | $3.03 \times 10^{-11}$                               | 0.59  | -236.25               | $1.02 \times 10^{-12}$ |
| <b>s-P1A</b> | $5.45 \times 10^{-13}$                               | 0.72  | -370.04               | $1.81 \times 10^{-14}$ |

<sup>a</sup> rms stands for root-mean-square deviation of the fit.

**Table 98** The NTS parameters for the *syn*-VyA + CN abstraction reaction.

|              | $A/\text{cm}^3 \text{ molecule}^{-1} \text{ s}^{-1}$ | $\epsilon^\ddagger/\text{kJmol}^{-1}$ | $T_0/\text{K}$ | $\text{rms}^a$         |
|--------------|------------------------------------------------------|---------------------------------------|----------------|------------------------|
| <b>s-P2A</b> | $1.98 \times 10^{-16}$                               | 14171.00                              | 0.01           | $1.26 \times 10^{-18}$ |
| <b>s-P3A</b> | $1.14 \times 10^{-13}$                               | 14825.34                              | 0.01           | $5.95 \times 10^{-16}$ |
| <b>s-P4A</b> | $1.92 \times 10^{-12}$                               | 44052.44                              | -330.96        | $4.89 \times 10^{-19}$ |

<sup>a</sup> rms stands for root-mean-square deviation of the fit.

### 6.2 *anti*-VyA + CN

**Table 99** The Arrhenius-Kooij parameters for the *anti*-VyA + CN addition reaction.

|              | $A/\text{cm}^3 \text{ molecule}^{-1} \text{ s}^{-1}$ | $n$   | $E/\text{kJmol}^{-1}$ | $\text{rms}^a$         |
|--------------|------------------------------------------------------|-------|-----------------------|------------------------|
| <b>a-P1</b>  | $2.08 \times 10^{-12}$                               | 0.05  | 69.23                 | $2.39 \times 10^{-14}$ |
| <b>a-P2</b>  | $1.26 \times 10^{-14}$                               | 0.38  | -103.58               | $1.39 \times 10^{-16}$ |
| <b>a-P3</b>  | $4.19 \times 10^{10}$                                | 0.18  | -4.28                 | $3.64 \times 10^{-13}$ |
| <b>a-P4</b>  | $1.77 \times 10^{14}$                                | 0.02  | 70.05                 | $1.60 \times 10^{-16}$ |
| <b>a-P5</b>  | $2.40 \times 10^{-13}$                               | 0.07  | 65.10                 | $3.62 \times 10^{-15}$ |
| <b>a-P6</b>  | $6.21 \times 10^{-12}$                               | -0.47 | 327.34                | $3.61 \times 10^{-13}$ |
| <b>a-P7</b>  | $3.69 \times 10^{-13}$                               | 0.18  | -3.10                 | $4.17 \times 10^{-16}$ |
| <b>a-P1A</b> | $6.63 \times 10^{-17}$                               | 0.59  | -224.19               | $1.80 \times 10^{-16}$ |

<sup>a</sup> rms stands for root-mean-square deviation of the fit.

**Table 100** The NTS parameters for the *anti*-VyA + CN abstraction reaction.

|              | $A/\text{cm}^3 \text{ molecule}^{-1} \text{ s}^{-1}$ | $\epsilon^\ddagger/\text{kJmol}^{-1}$ | $T_0/\text{K}$ | $\text{rms}^a$         |
|--------------|------------------------------------------------------|---------------------------------------|----------------|------------------------|
| <b>a-P2A</b> | $1.25 \times 10^{-16}$                               | 39493.88                              | -192.94        | $1.82 \times 10^{-23}$ |
| <b>a-P3A</b> | $2.85 \times 10^{-16}$                               | 8191.73                               | -0.01          | $1.44 \times 10^{-17}$ |
| <b>a-P4A</b> | $9.84 \times 10^{-15}$                               | 12951.95                              | -6.55          | $4.90 \times 10^{-17}$ |

<sup>a</sup> rms stands for root-mean-square deviation of the fit.

## 7 $\gamma(\beta)$ vs NTS fitting plots

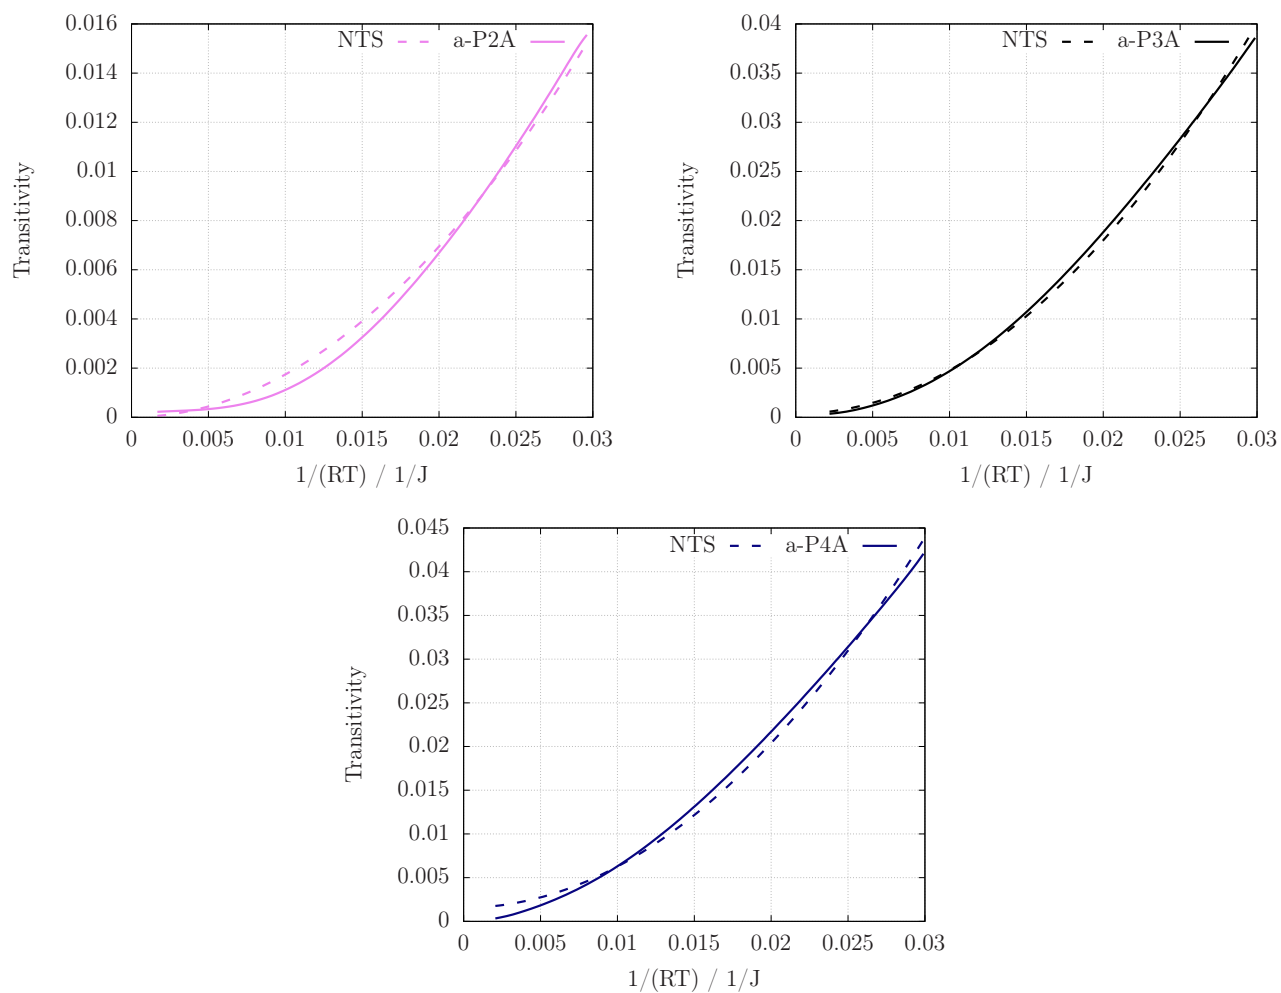

**Figure 1** Comparison between NTS fitting function and transitivity data obtained from the kinetic simulations for the abstraction reactions between *anti*-VyA + CN.

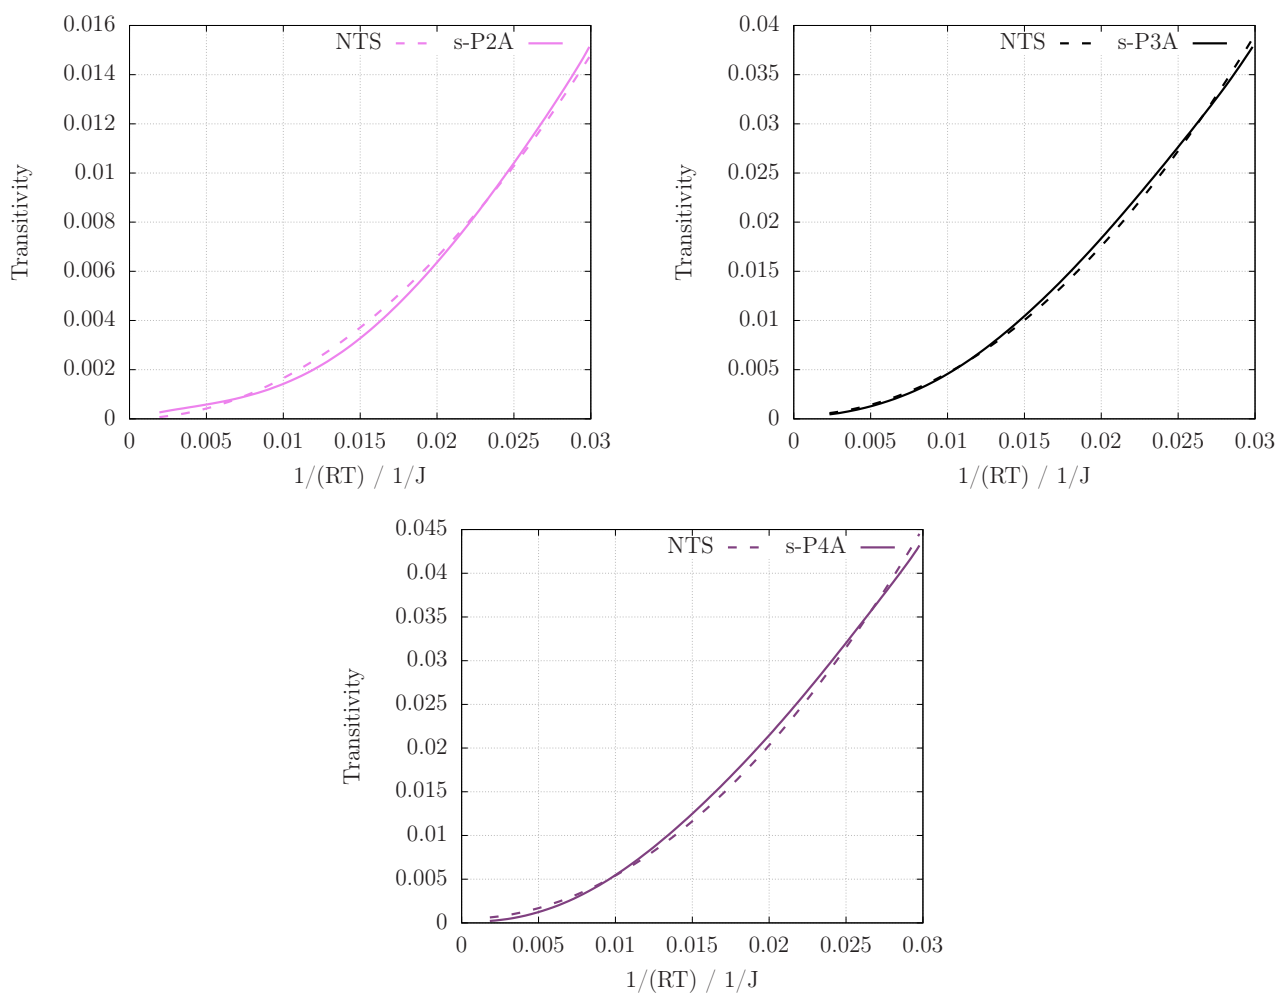

**Figure 2** Comparison between NTS fitting function and transitivity data obtained from the kinetic simulations for the abstraction reactions between *syn*-VyA + CN.
